# **NHJ-1 regulates canonical non-homologous end joining in *Caenorhabditis elegans***

Aleksandar Vujin<sup>1</sup>, Steven J. Jones<sup>2</sup>, Monique Zetka<sup>1,3</sup>

<sup>1</sup>Department of Biology, McGill University, Montreal, QC, Canada

<sup>2</sup>Canada's Michael Smith Genome Sciences Centre, BC Cancer Agency, Vancouver, BC, Canada

<sup>3</sup>Corresponding author - [monique.zetka@mcgill.ca](mailto:monique.zetka@mcgill.ca)

## Abstract

1  
2 Canonical non-homologous end joining (cNHEJ) is a near-universally conserved pathway  
3 for the repair of DNA double-strand breaks (DSBs). While the cNHEJ pathway  
4 encompasses more than a dozen factors in vertebrates and is similarly complex in other  
5 eukaryotes, in the nematode *C. elegans* the entire known cNHEJ toolkit consists of two  
6 proteins that comprise the Ku ring complex, *cku-70* and *cku-80*, and the terminal ligase  
7 *lig-4*. Here, we report the discovery of *nhj-1* as the fourth cNHEJ factor in *C. elegans*.  
8 Observing a difference in the phenotypic response to ionizing radiation (IR) between two  
9 lines of the wild type N2 strain, we mapped the locus causative of IR-sensitivity to a  
10 candidate on chromosome V. Using CRISPR-Cas9 mutagenesis, we show that disrupting  
11 the *nhj-1* sequence induces IR-sensitivity in an IR-resistant background. Double mutants  
12 of *nhj-1* and the cNHEJ factors *lig-4* or *cku-80* do not exhibit additive IR-sensitivity,  
13 arguing that *nhj-1* is a member of the cNHEJ pathway. Furthermore, like the loss of *lig-4*,  
14 the loss of *nhj-1* in the *com-1* genetic background, in which meiotic DSBs are repaired by  
15 cNHEJ instead of homologous recombination, increased the number of DAPI-staining  
16 bodies in diakinesis, consistent with increased chromosome fragmentation in the absence  
17 of cNHEJ repair. Finally, we show that NHJ-1 localizes to many somatic nuclei in the L1  
18 larva, but not the primordial germline, which is in accord with a role in the predominantly  
19 somatically active cNHEJ. Although *nhj-1* shares no sequence homology with other  
20 known eukaryotic cNHEJ factors and is taxonomically restricted to the Rhabditid family,  
21 its discovery underscores the evolutionary plasticity of even highly conserved pathways,  
22 and may represent a springboard for further characterization of cNHEJ in *C. elegans*.

23

## Introduction

24 Canonical non-homologous end joining (cNHEJ) is one of the two major DNA double-  
25 strand break (DSB) repair modalities, standing in contrast to homologous recombination  
26 repair (HRR) [1]. Although commonly described as error prone [2], cNHEJ is a very rapid  
27 and efficient mode of DSB repair, and is the preferred repair pathway in contexts where  
28 the fidelity of repair is less important than the imperative of restoring chromosome  
29 integrity, or whenever an appropriate repair template is unavailable, such as in somatic  
30 cells prior to S-phase [3, 4]. A number of “alternative” end joining pathways (Alt-EJ),  
31 including microhomology-mediated end joining and polymerase theta-mediated end  
32 joining [5, 6], have been identified, but these pathways appear to primarily, although not  
33 exclusively, act as “backup” DSB repair pathways in cNHEJ- and HR-deficient conditions  
34 [7].

35 The mechanism of cNHEJ involves three distinct steps: 1) DSB detection and tethering;  
36 2) DNA end processing; and 3) terminal ligation (reviewed in [8-10]). The first step is  
37 effected by nearly universally conserved Ku ring, a heterodimeric complex composed of  
38 Ku70 and Ku80, efficiently detects and binds free DNA ends in a sequence-independent  
39 manner, stabilizing and protecting them from extensive resection [9]. It then acts as a  
40 “toolbelt” for cNHEJ [11], recruiting a complex of proteins which in mammals includes  
41 kinases/phosphatases (DNA-PKcs, PNKP), nucleases (Artemis, aprataxin, APLF),  
42 polymerases (Pol X family members), and helicases (WRN) [10]. These enzymes act in  
43 the second step of cNHEJ to process the free DNA ends into a ligation-compatible form  
44 [9]. Finally, the conserved DNA ligase LIG4, in complex with the structural protein XRCC4,  
45 which oligomerizes to form long filaments with its paralogs XLF and the recently  
46 discovered PAXX [1], performs the third, terminal ligation step, restoring chromosomal  
47 integrity [9].

48 Canonical non-homologous end joining is a widely conserved DSB repair pathway, and  
49 is present in all three domains of life [12]. Vertebrates possess the best studied cNHEJ  
50 system and the highest number of participating proteins [10], with the cNHEJ systems in  
51 other organisms studied so far conserving a subset of the vertebrate cNHEJ factors. The  
52 Ku ring and DNA Ligase IV are universally conserved [12-16], but DNA-PKcs is absent in

53 flies, yeast, plants, and nearly all basal multicellular eukaryotic lineages [10, 13-15]. An  
54 Artemis ortholog exists in budding yeast but doesn't participate in cNHEJ [14], but flies  
55 appear to have lost this gene [15]. Three Artemis orthologs exist in the *Arabidopsis*  
56 genome, but it is not clear whether they play a role in cNHEJ [13]. Orthologs of the  
57 mammalian cNHEJ scaffold proteins XRCC4 and XLF exist in *S. cerevisiae* and  
58 participate in cNHEJ [14]. *Arabidopsis* possesses only XRCC4 [13], and although *D.*  
59 *melanogaster* retains one XRCC4 ortholog and two XLF orthologs, it is not known whether  
60 they play a role in cNHEJ in the fruit fly [15]. By contrast to other eukaryotes, the cNHEJ  
61 system in the nematode *C. elegans* consists of only the Ku70/Ku80 orthologs CKU-70  
62 and CKU-80, and the LIG4 ortholog LIG-4 [17]. While a homolog of WRN helicase exists,  
63 it plays no role in cNHEJ in the worm [17]. Thus, *C. elegans* has been hypothesized to  
64 either possess a "minimal" cNHEJ system, in which the Ku ring and LIG-4 are sufficient  
65 to repair the breaks, or to contain other factors which would be functionally analogous if  
66 not homologous to the cNHEJ factors in other organisms [16].

67 Here, we report the discovery of a fourth cNHEJ factor in *C. elegans*, which we named  
68 NHJ-1 (non-homologous end joining 1). It is encoded by *H19N07.3*, a gene which was  
69 found to confer resistance to bleomycin, a common chemotherapeutic drug that is  
70 radiomimetic (scb-1; sensitive to chemotherapeutic bleomycin 1) [18, 19]. Lacking  
71 homology to proteins outside the Rhabditid family or any conserved domains, we show  
72 that NHJ-1 is nevertheless essential for cNHEJ both in the L1 larva and in the adult  
73 germline, which is in accord with the reported bleomycin sensitivity. Thus, *C. elegans*  
74 appears to have reorganized an ancient and conserved DSB repair pathway by the  
75 addition of at least one taxonomically restricted protein and may consequently possess a  
76 larger cNHEJ toolkit than previously thought.

77

## Results

### 78 **An N2 strain variant exhibits unexpected ionizing radiation sensitivity**

79 During the course of an RNAi screen to identify novel factors that modulate the response  
80 of the adult germ line in *C. elegans* following exposure to ionizing radiation (IR) during the  
81 L1 stage, we observed a striking difference in IR sensitivity between our wild-type N2  
82 strain and the N2 from the neighboring laboratory of Dr. Richard Roy. Irradiated at the L1  
83 stage with 75 Gy, Zetka lab N2 animals produced significantly fewer progeny than Roy  
84 lab N2 (**Figure S1**). N2 is the most commonly used wild-type strain used by the *C. elegans*  
85 research community and is assumed to be isogenic [20], which made the difference in  
86 the IR response surprising. Although the N2 strain from the Caenorhabditis Genetics  
87 Center (CGC) showed the same post-IR brood size reduction as Zetka lab N2 (**Figure**  
88 **S1**), several N2 strains from other laboratories, as well as 18 non-N2 wild-type isolates of  
89 *C. elegans* and two isolates of *C. briggsae* displayed a resistant IR response (**Table S1**),  
90 suggesting that IR sensitivity arose in the N2 lineage at some point during its cultivation  
91 as a laboratory strain. We were interested in uncovering the origin of this IR sensitivity.  
92 To maintain a high degree of isogeneity, we derived a sensitive strain (henceforth, N2 [S])  
93 from a single individual from the CGC N2, and a resistant strain (henceforth, N2 [R]) from  
94 a single animal isolated from the N2 strain from Eric Andersen's laboratory (Northwestern  
95 University). All subsequent characterization of the phenomenology was performed in  
96 these two strains.

97 We first asked whether the IR response is dose dependent, or represents a binary  
98 response. Both N2 [S] and N2 [R] showed a dose-dependent response, with the brood  
99 size of N2 [R] decreasing from a median of 291.5 progeny in unirradiated animals to 256  
100 progeny when treated with 25 Gy, 41 progeny when irradiated with 50 Gy, and 1 progeny  
101 when exposed to 75 Gy (**Figure 1A**). The unirradiated brood size of 284.5 progeny in N2  
102 [R] was not significantly reduced when exposed to 25 Gy (median 289 progeny) or 50 Gy  
103 (255 progeny), but was significantly reduced when irradiated at 75 Gy (median 191  
104 progeny,  $p < 0.001$  vs unirradiated controls) (**Figure 1A**). At each tested IR dose, however,

105 the brood size of N2 [S] animals was significantly lower than that of N2 [R] animals  
106 ( $p < 0.05$  at 25 Gy;  $p < 0.001$  at 50 Gy and 75 Gy) (**Figure 1A**).

107 We then asked whether the difference in the IR response is general or developmentally  
108 restricted. To test this, we irradiated the animals at the L4 stage, when the somatic  
109 development is largely complete and the germline consists of hundreds of cells [21]. While  
110 irradiation with 75 Gy at the L4 stage did reduce the brood size in N2 [R] from a median  
111 of 321 progeny to a median of 145 progeny ( $p < 0.001$ ) and in N2 [S] from a mean of 315.5  
112 progeny to a median of 141.5 progeny ( $p < 0.001$ ), there was no statistically significant  
113 difference between the two strains (**Figure 1B**). The reduction in brood size following IR  
114 at the L4 stage can be attributed to high embryonic lethality ( $>50\%$  in both genotypes)  
115 (**Table S2**). Interestingly, embryonic lethality in N2 [S] animals irradiated with 75 Gy at L1  
116 was not different than that of unirradiated controls, while irradiated N2 [R] animals showed  
117 a significantly increased embryonic lethality (9.45%) compared to unirradiated controls  
118 (0.63%,  $p < 0.001$ ) (**Table S2**).

119 We also wanted to test whether the differential brood size response of N2 [R] and N2 [S]  
120 is specific to IR or reflects a general difference in response to genotoxic stress. Treatment  
121 with ethyl-nitrosourea (ENU) which primarily causes base alkylation [22], resulted in a  
122 brood size reduction in both N2 [R] (untreated control median of 262 progeny, 5mM ENU  
123 median of 182 [ $p < 0.01$  vs untreated] and 10mM ENU median of 110.5 progeny [ $p < 0.001$   
124 vs untreated] and N2 [S] (control median of 235 progeny, 5mM ENU median of 144  
125 [ $p < 0.001$  vs untreated], and a 10mM ENU median of 35 progeny [ $p < 0.001$  vs untreated])  
126 (**Figure 1C**). Despite a trend for lower brood size in N2 [S] at 10 mM ENU, there was no  
127 significantly different difference between the two genotypes at the doses tested.  
128 Irradiation with ultraviolet (UV) light, which predominantly causes pyrimidine dimers [23],  
129 likewise resulted in the same extent of brood size reduction at 50 J/m<sup>2</sup> in both N2 [R]  
130 (unirradiated median of 306.5 progeny vs an irradiated median of 12 progeny [ $p < 0.001$ ])  
131 and N2 [S] (control median of 328 progeny and an irradiated median of 32.5 progeny  
132 [ $p < 0.001$ ]), but there was no significant difference between the two strains. At 100 J/m<sup>2</sup>,  
133 UV treatment resulted in terminal larval arrest in both genotypes (**Figure 1D**). These data  
134 suggest that the sensitivity of N2 [S] is restricted to IR.

## 135 **N2 [S] displays somatic post-IR phenotypes**

136 In addition to the difference in post-IR brood size, we noticed also noticed that N2 [S]  
137 animals displayed several post-IR somatic phenotypes that were observed with much  
138 lower frequencies in N2 [R] (**Figure 2A-D**). Prominently, irradiated N2 [S] animals  
139 exhibited a marked slow growth (Gro) phenotype. At 3 days after radiation treatment,  
140 when all control animals have developed into adults, as did 94% of irradiated N2 [R]  
141 animals, 61% of irradiated of the irradiated N2 [S] population was still in a larval stage,  
142 mostly (54%) L4 ( $p < 0.001$  vs irradiated N2 [R]) (**Figure 2A**). Furthermore, 27% of N2 [S]  
143 animals exhibited vulval phenotypes, including protruding vulva (Pvl) and ruptured  
144 through vulva (Rup), compared to just under 2% of irradiated N2 [R] animals ( $p < 0.001$ )  
145 (**Figure 2A**). Four days after treatment, although the majority (88%) of irradiated N2 [S]  
146 animals developed into adults, the incidence of vulval phenotypes remained high (57%  
147 Pvl and 19% Rup) compared to that in irradiated N2 [R] (just under 5%;  $p < 0.001$ ) (**Figure**  
148 **2B**), suggesting that the N2 [S] larvae were developing into morphologically abnormal  
149 adults. Consistent with the vulval phenotypes, a significantly higher proportion of  
150 irradiated N2 [S] animals (25-31%) exhibited an egg laying defective (Egl), compared to  
151 irradiated N2 [R] animals (2-3%;  $p < 0.001$ ) (**Figure 2D**). These phenotypes were  
152 reminiscent of those reported for irradiated cNHEJ mutants [17], suggesting the possibility  
153 that N2 [S] was IR sensitive because of a loss of function in cNHEJ.

## 154 **N2 [S] is recessive to N2 [R]**

155 A loss-of-function in a cNHEJ or another DNA repair factor would generally be expected  
156 to be genetically recessive. To test whether IR resistance is dominant or recessive to IR  
157 sensitivity, we compared the L1 IR response in F1 animals obtained from N2 [S]  
158 hermaphrodites mated to N2 [S] males, the N2 [S/S] homozygotes, and N2 [S]  
159 hermaphrodites mated to N2 [R] males, the N2 [R/S] heterozygotes. Irradiated with 50 Gy  
160 of IR at the L1 stage, the N2 [R/S] heterozygotes had a significantly higher brood size  
161 (median of 276 progeny) compared to N2 [S/S] homozygotes (median of 24 progeny;  
162  $p < 0.001$ ) (**Figure 3A**). N2 [R/S] heterozygotes also exhibited a much lower frequency of  
163 somatic phenotypes four days after IR treatment, with a vulval phenotype incidence of  
164 just over 5%, compared to 62% in N2 [S/S] homozygotes ( $p < 0.001$ ) (**Figure 3B**),

165 demonstrating that IR resistance is dominant over IR sensitivity, and suggesting the  
166 presence of a loss of function mutation(s) in the N2 [S] genetic background.

### 167 **Loss of *H19N07.3/nhj-1* function results in IR sensitivity**

168 To identify the mutation causative of IR sensitivity in N2 [S], we sequenced the N2 [S]  
169 and N2 [R] genomes to high (>100X) coverage. Using coding variants unique to the N2  
170 [S] genome (**Table S3**) as molecular markers, we mapped (**Figure S2**) the causative  
171 locus to a region on chromosome V which contained an indel in the gene *H19N07.3*.  
172 Because of the resemblance of the IR-sensitivity of N2 [S] to that of cNHEJ mutants [17],  
173 we have named the gene *nhj-1* (non-homologous end joining 1). The N2 [S] mutation in  
174 *nhj-1* is an indel in exon 3 (**Figure 4A**), consisting of a 5-nucleotide deletion, an insertion  
175 of 107 nucleotides of unknown origin that are predicted to form a strong hairpin (**Figure**  
176 **4B**), and an 8-nucleotide duplication. We have designated this allele *vv148*, and used  
177 CRISPR mutagenesis to create a 7-nucleotide deletion in *nhj-1* in the N2 [R] background  
178 (**Figure 4A**), designated *vv144*. Introducing the *nhj-1(vv144)* allele into the [R]  
179 background resulted in a significant reduction in fertility post-IR, with the median brood  
180 size of 4 progeny, compared to 179.5 progeny in N2 [R] ( $p < 0.001$ ) and 0 progeny in N2  
181 [S] ( $p > 0.05$ ) (**Figure 5A**). All irradiated *nhj-1(vv144)* animals also exhibited either  
182 developmental delay or vulval phenotypes, in contrast to only 18% of N2 [R] animals  
183 which showed slowed growth ( $p < 0.001$ ), but not different than N2 [S] animals ( $p > 0.05$ )  
184 (**Figure 5B**). This result strongly suggested that *nhj-1* is causative of the IR sensitivity in  
185 N2 [S]. To investigate this possibility, we performed a complementation test between the  
186 N2 [S] and N2 [R] genomes and *nhj-1(vv144)* [R]. While the N2 [R] genome was able to  
187 fully complement *nhj-1(vv144)* [R] mutants for post-IR brood size (median of 149 progeny  
188 in the heterozygote, compared to 108 progeny in N2 [R] [ $p > 0.05$ ] and 2 progeny in N2  
189 [S] [ $p < 0.001$ ]), the N2 [S] genome was not (median of 2 progeny in the heterozygote  
190 [ $p < 0.001$  vs N2 [R] and  $p > 0.05$  vs N2 [S]]) (**Figure 5C**). Similarly, the incidence of somatic  
191 phenotypes in *nhj-1(vv144)* [R]/*nhj-1(vv148)* [S] heterozygotes (81.2%) was not different  
192 than in homozygous *nhj-1(vv148)* [S] animals (79.6%;  $p > 0.05$ ), while that of *nhj-1(vv144)*  
193 [R]/*nhj-1(+)* [R] heterozygotes (6.0%) was not different than that of *nhj-1(+)* [R]  
194 homozygotes (18.2%;  $p > 0.05$ ) (**Figure 5D**).



195 **Somatic and brood size IR phenotypes of *nhj-1* mutants are rescued by**  
196 **extrachromosomally expressed NHJ-1**

197 We next wanted to test whether the loss of *nhj-1* function can be complemented  
198 molecularly by an extrachromosomal source of *nhj-1*. *nhj-1(vv144)* was crossed into a  
199 strain carrying *goeEx386*, a fosmid containing a GFP-tagged *nhj-1* sequence and the wild  
200 type *unc-119* sequence as a selection marker, which was created as part of the  
201 TransgeneOme project [24]. The post-IR brood size of *nhj-1(vv144); unc-119(ed3);*  
202 *goeEx386* animals (median of 131 progeny) was significantly higher than that of *nhj-*  
203 *1(vv144)* mutants alone (median of 1 progeny;  $p < 0.001$ ) (**Figure 6A**). Somatic  
204 phenotypes were also rescued in *nhj-1(vv144); unc-119(ed3); goeEx386*, with only 4.3%  
205 of animals showing Gro or vulval phenotypes, compared to 94.6% ( $p < 0.001$ ) in *nhj-*  
206 *1(vv144)* mutants (**Figure 6B**). These results suggest that both somatic and brood size  
207 phenotypes of *nhj-1(vv144)* can be rescued by an exogenous wild-type copy of the gene.  
208 To test this further, and to remove the potentially confounding effect of the rescue of *unc-*  
209 *119(ed3)*, we also compared the post-IR phenotypes of *nhj-1(vv148)* animals  
210 heterozygous for *unc-119* to those of the same genotype but also carrying the *goeEx386*  
211 fosmid. The post-IR brood size of animals with the extrachromosomal *nhj-1* was  
212 significantly higher (median of 109.5 progeny) than that of animals without the fosmid  
213 (median of 12.5 progeny,  $p < 0.001$ ) (**Figure 6C**). The incidence of somatic phenotypes is  
214 significantly lower in the animals with the fosmid (26.7%) than without (69.6%,  $p < 0.001$ )  
215 (**Figure 6D**). These results collectively indicate that the loss of *nhj-1* activity leads to IR  
216 sensitivity.

217 **NHJ-1 functions in the canonical non-homologous end joining pathway**

218 To genetically test whether *nhj-1* has a role in the cNHEJ pathway, we used CRISPR  
219 mutagenesis to inactivate the terminal cNHEJ ligase, *lig-4*, in the N2 [R] and the N2 [S]  
220 background, hypothesizing that if *nhj-1* and *lig-4* function in different pathways, the double  
221 mutant would have a more severe phenotype than either single mutant. Because both N2  
222 [S] (**Figure 1A, Figure 2A-B**) and the *lig-4(vv134)* null allele (**Figure S3**) in the resistant  
223 background exhibit a response so severe at 75 Gy that additivity would be difficult to  
224 discern, we halved the dose to 37.5 Gy. At this dose, the resistant and sensitive response

225 are clearly distinguishable, but the sensitive response is not so severe as to not be  
226 augmentable. After treatment with 37.5 Gy of IR, *lig-4* mutants in the [S] background  
227 showed a median brood size of 170.5 progeny, which was not significantly different from  
228 either *lig-4* mutants in the [R] background (median brood size of 102 progeny;  $p > 0.05$ ) or  
229 N2 [S] animals (median brood size of 188 progeny;  $p > 0.05$ ), but significantly lower than  
230 that of N2 [R] animals (median brood size of 290 progeny;  $p < 0.001$ ) (**Figure 7A**). The  
231 incidence of somatic phenotypes in *lig-4* [S] animals (45.2%) was not significantly different  
232 than that of *lig-4* [R] animals (48.1%;  $p > 0.05$ ), but was higher than that of N2 [S] animals  
233 (25.5%;  $p < 0.001$ ) or N2 [R] animals (0.0%,  $p < 0.001$ ) (**Figure 7B**). Because no additivity  
234 in phenotype was observed between *lig-4* and the inactivation of *nhj-1* in the N2 [S]  
235 background, these results strongly suggest that *lig-4* and *nhj-1* fall in the same pathway,  
236 and that *nhj-1* is a member of the cNHEJ pathway. We also tested for additivity of IR  
237 response in double mutants carrying *nhj-1(vv144)* and a published allele of the Ku ring  
238 component, *cku-80(tm1203)*. The median post-IR brood size of *cku-80(tm1203); nhj-*  
239 *1(vv144)* double mutants was 40.5 progeny, which was not significantly different than  
240 either *cku-80(tm1203)* single mutants (median of 55 progeny;  $p > 0.05$ ) or *nhj-1(vv144)*  
241 single mutants (median of 70 progeny;  $p > 0.05$ ), but was significantly lower than that of  
242 N2 [R] animals (median of 187.5 progeny;  $p < 0.001$ ) (**Figure 7C**). Similarly, the somatic  
243 phenotype incidence of *cku-80(tm1203); nhj-1(vv144)* double mutants (40.1%) was not  
244 significantly different than *cku-80(tm1203)* single mutants (46.0%,  $p > 0.05$ ) or *nhj-*  
245 *1(vv144)* single mutants (45.5%;  $p > 0.05$ ), and higher than that of N2 [R] animals (6.2%,  
246  $p < 0.001$ ) (**Figure 7D**). Collectively with the results of the *lig-4* double mutants, these  
247 observations support the interpretation that NHJ-1 acts in the cNHEJ pathway.

## 248 **NHJ-1 acts downstream of Ku**

249 Previously known *C. elegans* cNHEJ factors include the Ku ring components CKU-70 and  
250 CKU-80, which presumably act in DSB detection and DNA end protection/tethering, and  
251 LIG-4, which presumably performs the terminal ligation step of the pathway [1, 17]. NHJ-  
252 1 could be acting together with Ku in the first step, or at any of the downstream steps  
253 described in other organisms [8-10], including as a processing factor, a structural scaffold,  
254 or a co-factor in an enzymatic reaction. To test whether NHJ-1 acts in cNHEJ initiation,

255 or at a downstream event, we made use of a *com-1* deficient background. In prophase I  
256 of *C. elegans* meiosis, COM-1 acts to prevent Ku binding to the free DNA ends of meiotic  
257 DSBs generated by the topoisomerase II-like enzyme SPO-11 [25]. This allows for inter-  
258 homolog HRR and crossover (CO) formation to take place, which is a critical both for the  
259 generation of allelic diversity and for proper segregation of homologous chromosomes in  
260 anaphase I [26]. Loss of COM-1 function thus results in cNHEJ-based repair of SPO-11  
261 induced meiotic DSBs, leading to a loss of COs and nearly complete embryonic lethality  
262 [25]. The lethality of *com-1* mutants can be rescued by removal of either *cku-70* or *cku-*  
263 *80*, consistent with the idea that HRR can initiate on meiotic DSBs if the Ku ring has not  
264 loaded, but cannot be rescued by the loss of *lig-4*, consistent with the interpretation that  
265 Ku loading prevents HRR even if repair by cNHEJ cannot complete [25]. Consistent with  
266 previous reports, we found that RNAi-mediated knockdown of *cku-80* in the *com-1(t1626)*  
267 genetic background restores embryonic viability to 26.42%, compared to 0.31% in control  
268 *com-1(t1626)* animals ( $p < 0.001$ ) (**Figure 8A**). Also in agreement with published data,  
269 *com-1(t1626) lig-4(vv134)* double mutants have the same embryonic viability (0.53%) as  
270 *com-1(t1626)* single mutants ( $p > 0.05$ ) (**Figure 8A**). The embryonic viability of *com-*  
271 *1(t1626); nhj-1(vv144)* double mutants (0.00%) is also not significantly different than that  
272 of *com-1(t1626)* single mutants ( $p > 0.05$ ) (**Figure 8A**). The lack of rescue of embryonic  
273 viability thus suggests that *nhj-1* is dispensable for Ku loading to meiotic DSBs. The  
274 morphology of DAPI-staining bodies was diverse but similar in *com-1* single mutants and  
275 *com-1 lig-4* and *com-1; nhj-1* double mutants (**Figure 8B**). The number of DAPI-staining  
276 bodies in *com-1; nhj-1* double mutants (median of 5 bodies) was not significantly different  
277 than that of *com-1; lig-4* double mutants (median of 4 bodies,  $p > 0.05$ ), but was  
278 significantly higher than that of *com-1* single mutants (median of 3 bodies,  $p < 0.001$ )  
279 (**Figure 8C**), consistent with the interpretation that a deficiency in cNHEJ activity in *lig-4*  
280 and *nhj-1* mutant backgrounds leads to greater chromosome fragmentation.

## 281 **Endogenous NHJ-1 protein localizes to somatic cell nuclei in the L1 larva and** 282 **meiocyte nuclei of prophase I in adult animals**

283 We also wanted to investigate the localization pattern of the endogenous NHJ-1 protein,  
284 and tagged the C-terminus of *nhj-1* with the small epitope tag OLLAS [27].

285 Immunostaining with anti-OLLAS antibodies revealed that NHJ-1 localizes to many  
286 somatic cell nuclei in the L1 larva, but is conspicuously absent from the primordial germ  
287 cells (**Figure 9A, 9B**), consistent with a role in cNHEJ, which occurs in the nucleus and  
288 is primarily restricted to somatic cells [17]. Radiation treatment did not visibly alter this  
289 localization pattern (**Figure 9A, 9B**). Because in mammalian cNHEJ, the nuclear  
290 localization of XRCC4 depends on its binding partner LIG4 [28], we also wanted to test  
291 whether the localization of NHJ-1 depended on the Ku ring or LIG-4. However, the  
292 localization pattern of NHJ-1 is not affected in backgrounds deficient for either *cku-80* or  
293 *lig-4* (**Figure 9A, 9B**), demonstrating that NHJ-1 does not require these cNHEJ  
294 components for localization to the nucleus. In the adult germline, NHJ-1 first becomes  
295 reliably detectable in diplotene nuclei, and persists in diakinesis (**Figure 10A**), consistent  
296 with its role in cNHEJ, which in adult meiocytes is a backup DNA repair process that  
297 normally occurs only in the absence of functional COM-1. Like in the L1 larvae, the  
298 localization of NHJ-1 in the adult germline is unaffected by either the loss of *cku-80*  
299 (**Figure 10B**) or *lig-4* (**Figure 10C**).

### 300 **Endogenous LIG-4 localizes to intestinal cell nuclei in the L1 larva, and nuclei of** 301 **adult prophase I meiocytes**

302 Since nothing is known about the endogenous localization pattern of the previously  
303 described *C. elegans* cNHEJ factors, we also investigated the localization of LIG-4, the  
304 terminal effector of the pathway. Like NHJ-1, LIG-4 is not detectable in the primordial  
305 germ cells of the L1 larva (**Figure 11A, 11B**). Unlike NHJ-1, it is reliably detectable only  
306 in a longitudinal array of somatic cell nuclei (**Figure 11A, 11B**), which are inferred to be  
307 intestinal cell nuclei since they co-express a GFP reporter under the control of the  
308 intestinal cell promoter *elt-2* (**Figure 11C**). Like that of NHJ-1, the localization pattern of  
309 LIG-4 in the L1 is unaffected by the loss of other known cNHEJ factors, *nhj-1* and *cku-80*,  
310 or by exposure to ionizing radiation (**Figure 11A, 11B**). In the adult meiocytes, the  
311 localization of LIG-4 is similar to that of NHJ-1, except that it becomes reliably detectable  
312 already in pachytene, persisting into diakinesis (**Figure 12A**). Like in the L1, this pattern  
313 is not altered in absence of *cku-80* (**Figure 12B**) or *nhj-1* (**Figure 12C**). The distinct  
314 patterns of LIG-4 and NHJ-1 localization raise the question of how cNHEJ is coordinated

315 in various tissue contexts, and whether individual components of the pathway may have  
316 pleiotropic roles.

## 317 Discussion

### 318 **A laboratory N2 line carries a radiosensitizing mutation**

319 Here, we have presented the discovery of a critical role in canonical non-homologous  
320 end-joining for *H19N07.3/nhj-1*, a gene which has been recently reported to play a role in  
321 bleomycin resistance [18]. We initially observed a strongly divergent phenotypic response  
322 to ionizing radiation in several lines of the N2 strain, in which the sensitive N2 [S] line  
323 displayed a markedly reduced brood size as well as slow growth and vulval dysgenesis  
324 phenotypes that the resistant N2 [R] line did not, which prompted us to more closely  
325 examine the phenomenon. Treatment with ethyl-nitrosourea and UV radiation strongly  
326 suggested that the sensitive line N2 [S] is specifically sensitive to IR, and not other  
327 genotoxic stressors, and only at the early larval stages. Since this IR-sensitive phenotype  
328 segregated in a Mendelian pattern, we sequenced the N2 [S] and N2 [R] genomes, and  
329 using homozygous variants as molecular markers, mapped a candidate for the causative  
330 variant to an indel in the *H19N07.3/nhj-1* locus. We concluded that the loss of *nhj-1* is  
331 responsible for IR sensitivity of N2 [S] since inactivation of *nhj-1* by CRISPR-Cas9 in the  
332 N2 [R] genome was sufficient to induce radiation sensitivity and the CRISPR allele *vv144*  
333 was unable to complement the natural allele *vv148*. Since unannotated cryptic genetic  
334 variation has been documented to occur in laboratory strains of *C. elegans* as a result of  
335 drift [29], this finding was surprising only in the magnitude of the effect.

### 336 ***H19N07.3/nhj-1* is a novel *C. elegans* cNHEJ factor**

337 Because IR efficiently induces DNA DSBs and a cNHEJ deficiency has been observed in  
338 *C. elegans* to cause somatic phenotypes similar to the ones we observed in N2 [S] [17],  
339 we investigated the possibility that N2 [S] is sensitive because of a loss of a cNHEJ factor.  
340 In genetic *nhj-1; lig-4* and *nhj-1; cku-80* double mutants, we did not observe additive IR  
341 sensitivity, suggesting that *nhj-1* is a cNHEJ factor. This conclusion is further supported

342 by an increase in the number of DAPI bodies in *com-1; nhj-1* mutants, compared to *com-*  
343 *1* mutants alone, which is also observed in *com-1; lig-4* mutants, and is consistent with  
344 the interpretation that the increased DNA fragmentation in *com-1; nhj-1* mutants results  
345 from a loss of cNHEJ activity. The recent findings that NHJ-1 is required for resistance to  
346 bleomycin, a chemotherapeutic agent that can cause DNA DSBs, [18] accord with our  
347 results of a role in cNHEJ. With the notable exception of vertebrates, who rely on cNHEJ  
348 factors for V(D)J recombination to generate an adaptive immune response [30], cNHEJ  
349 is dispensable for survival in eukaryotes. This may have allowed an inactivating mutation  
350 in a critical cNHEJ factor to spread in laboratory populations.

351 *C. elegans* was thought to either possess a minimal cNHEJ system, composed of only  
352 the Ku ring and LIG-4, or that other cNHEJ components such as nucleases or kinases,  
353 had yet to be identified because no saturated screen for cNHEJ factors has been done  
354 [16]. While the role of *nhj-1* in the cNHEJ pathway remains opaque, the increased number  
355 of diakinetically DAPI bodies in *com-1; nhj-1* double mutants compared to *com-1* single  
356 mutants suggests that it acts downstream of Ku, and likely upstream of LIG-4, which  
357 performs the terminal ligation step. The roles NHJ-1 may play downstream of Ku binding  
358 include: 1) DNA end processing; 2) Signaling to coordinate the activity or assembly of the  
359 cNHEJ complex; 3) Promoting the activity of other cNHEJ pathway components as a  
360 cofactor; and 4) Acting as a structural scaffold to organize and coordinate other cNHEJ  
361 factors. Our analysis and that of others [18] shows that NHJ-1 contains no conserved  
362 domains. Together with the relatively small size of the protein (the longer of the two  
363 isoforms is 168 amino acids long), we consider the possibility that NHJ-1 is an enzyme  
364 unlikely. Signaling and processing enzymes with active roles in cNHEJ tend to be much  
365 larger, with the ~4,000 amino acid-long DNA-PKcs at the higher end of the spectrum, and  
366 the ~500 amino acid-long nuclease APLF at the lower end [1]. By contrast, the structural  
367 proteins XRCC4, XLF, and PAXX, are of much more modest size, ranging from 201 aa  
368 (PAXX) to 334 aa (XRCC4) in *H. sapiens* [1], although XRCC4 and XLF have been shown  
369 to oligomerize into much larger filaments that support other cNHEJ machinery [31, 32].  
370 NHJ-1 could act in an analogous manner in *C. elegans*, even though it shares no  
371 sequence homology with XRCC4 or its homologs. However, a role in an enzyme-driven

372 step of cNHEJ cannot be definitively excluded, as NHJ-1 could act as a co-factor to  
373 promote enzymatic activity or even possess enzymatic activity itself.

374 As previously noted [18], the scope of the evolutionary conservation of NHJ-1 is limited  
375 to closely related nematodes. Proteins with high identity with the NHJ-1 long isoform exist  
376 in several species of the genus *Caenorhabditis*, including *C. brenneri* (90% identity), *C.*  
377 *briggsae* (88% identity), *C. remanei* (84% identity), and *C. latens* (84% identity). In the  
378 family Rhabditidae, which includes the genus *Caenorhabditis*, there are two homologs in  
379 the asexual worm *Diploscapter pachys* (33% and 32% identity). The only other proteins  
380 with homology belong to two parasitic hookworms in the family Ancylostomatidae,  
381 *Necator americanus* (24% identity), and *Ancylostoma duodenale* (22% and 20% identity).  
382 What roles the homologs of NHJ-1 play in the other nematodes is not known. However,  
383 given the relatively high sequence conservation within *Caenorhabditis*, NHJ-1 homologs  
384 in the other species of this genus may also participate in cNHEJ. The nematode family  
385 Rhabditidae, thus appears to have evolved a novel regulator of the nearly universally  
386 conserved [12] cNHEJ pathway, illustrating the evolutionary plasticity of even the most  
387 ancient pathways. The lack of sequence conservation between NHJ-1 and the known  
388 cNHEJ factors in other phyla also highlights the possibility that the cNHEJ toolkit in *C.*  
389 *elegans* may be much larger, and novel functional analogs to other cNHEJ factors may  
390 yet be discovered.

### 391 **NHJ-1 localization is consistent with a role in cNHEJ**

392 We also examined the subcellular localization of NHJ-1 and LIG-4 in L1 larvae and adult  
393 gonad and intestinal tissue, both of which raised interesting questions about the  
394 regulation of cNHEJ in specific tissue contexts. The localization of cNHEJ components,  
395 the regulation of their recruitment to sites of DNA damage, and their dependence on other  
396 cNHEJ factors for nuclear recruitment has primarily been studied in the context of cultured  
397 mammalian cells [33-37]. As expected for DNA repair factors, Ku, DNA-PKcs, XRCC4,  
398 XLF, PAXX, and LIG4 are predominantly nuclear, with Ku and possibly others excluded  
399 from the nucleus only during mitosis [33, 35, 36, 38-40]. By contrast, few published  
400 studies have examined the localization of cNHEJ factors in the tissue or organ context.  
401 In healthy human colon tissue, Ku70 is detectable by immunohistochemistry in 74% of

402 nuclei, in contrast to Ku80, which can be seen in only 32% of nuclei [41]. Similarly, many  
403 but not all cells in the crypts of human and murine small intestine express LIG4, which is  
404 detectable in both nuclei and the cytoplasm in the cells that express it [42]. In the mouse  
405 testis, Ku70 localizes to the nuclei of the somatic Sertoli cells, spermatogonia, late (post-  
406 pachytene) spermatocytes I, spermatocytes II, and spermatids [43].

407 These observations are concordant with our localization data. In *C. elegans*, NHJ-1 and  
408 LIG-4 are nuclearly localized in both the L1 larva and the adult gonad and intestine. In  
409 the adult germline, the two proteins have a similar expression pattern, with strongest  
410 expression in diplotene and diakinesis, although LIG-4 becomes visible in pachytene.  
411 This is in line with the role of cNHEJ as a backup DNA repair pathway during meiotic  
412 prophase I, when inter-homolog HR repair is heavily favored [16, 17, 44, 45]. This  
413 expression pattern is also reminiscent of the localization of Ku70 in the mouse  
414 seminiferous tubules [43], except that some Ku70 expression is seen in spermatogonia  
415 while neither NHJ-1 nor LIG-4 are visible in the mitotic zone of *C. elegans*. The tissue-  
416 level expression pattern of NHJ-1 and LIG-4 in the L1 larva is markedly different, however.  
417 While NHJ-1 localizes to many somatic nuclei, LIG-4 is detectable primarily in the  
418 intestine. Several possibilities exist that could explain this discordance. NHJ-1 could be  
419 pleiotropic and possess a cNHEJ-independent function in non-intestinal cells, although it  
420 is unlikely that cNHEJ would operate only in the intestinal cells at the L1 stage. Expression  
421 levels of LIG-4 may be below the detection threshold in non-intestinal nuclei, which would  
422 suggest a relative enrichment of LIG-4 in intestinal cells compared to other tissues.  
423 Although intestinal cell nuclei are diploid in the early L1 larva, their ploidy doubles with  
424 each larval stage to the final number of 32 copies of each chromosome in adult [46],  
425 suggesting that the LIG-4 enrichment may reflect a greater need for cNHEJ in this tissue.  
426 In addition to increased ploidy, an increased requirement for cNHEJ in the intestinal cells  
427 may result from the fact that these cells are the ones most likely to be directly exposed to  
428 toxins produced by pathogenic bacteria and other microbiota which can colonize the  
429 intestinal lumen [47]. However, NHJ-1 is not enriched in intestinal nuclei compared to  
430 other somatic nuclei, suggesting that a general enrichment of cNHEJ factors is not  
431 sufficient to explain the LIG-4 pattern.



432 Our study has revealed *nhj-1* as a novel player in the *C. elegans* cNHEJ toolkit, and is in  
433 agreement with the recent findings that *nhj-1/scb-1* is required for resistance to  
434 bleomycin, a chemotherapeutic agent that induces DNA DSBs [18]. The challenge now  
435 is to elucidate the mechanistic role of NHJ-1 in the cNHEJ process, as well as to identify  
436 other potential cNHEJ factors in *C. elegans* and related nematodes.

437

## 438 **Materials and methods**

### 439 ***Caenorhabditis* strain maintenance and mating**

440 All *C. elegans* and *C. briggsae* strains have been maintained under standard conditions,  
441 at 20°C on Nematode Growth Medium (NGM) with the *E. coli* strain OP50 as a food  
442 source [48, 49]. The sensitive N2 [S] strain was derived from a single animal isolated from  
443 the N2 line from the *Caenorhabditis* Genetics Center. The IR-resistant N2 [R] strain was  
444 derived from a single animal isolated from the N2 line generously supplied by Dr. Erik  
445 Andersen. For a list of strains used in this study, see **Table S4**.

446

### 447 **Ionizing radiation treatment**

448 Animals were treated with ionizing radiation in the form of X-rays (RS 2000 small animal  
449 X-ray irradiator, Rad Source Technologies Inc) at the rate of 2.34 Gray per minute. Control  
450 animals were kept next to the IR source during the irradiation.

451 For homozygous L1 animals, irradiation was performed in M9 buffer in 1.5 ml  
452 microcentrifuge tubes. Synchronized L1 animals were obtained by hypochlorite treatment  
453 as previously described [50], with the following modifications: washes were done in water  
454 instead of M9 buffer, the animals were treated with hypochlorite for 10-12 minutes, and  
455 the hypochlorite solution recipe used was 3.3 ml water, 1.2 ml sodium hypochlorite (4%),  
456 0.5 sodium hydroxide (0.5M). After hypochlorite treatment, the eggs were left overnight  
457 in M9 buffer in 15 ml centrifuge tubes to hatch. Two hours before irradiation, a

458 concentrated culture of OP50 *E. coli* in the amount totaling 10% of the M9 buffer volume  
459 was added to the 15 ml centrifuge tubes as a food source for the L1-arrested larvae.  
460 Immediately before irradiation, the larvae were transferred to 1.5 ml microcentrifuge  
461 tubes, and irradiated as described above. Following irradiation, the animals were  
462 transferred by glass Pasteur pipettes to fresh NGM plates.

463 For heterozygous and homozygous L1 cross-progeny, irradiation was performed on NGM  
464 plates. Near-synchronized cross-progeny L1s were obtained by isolating mated  
465 hermaphrodites on NGM plates, allowing them to lay eggs for 4 hours, and then removing  
466 them from the plates. The plates containing hatched L1 larvae were irradiated 12-14  
467 hours after the removal of the mothers.

468 For L4 animals, irradiation was performed on NGM plates. Animals were synchronized  
469 using hypochlorite treatment as described above and dispensed onto NGM plates. After  
470 48 hours, the L4 animals were irradiated directly on the plate.

#### 471 **ENU treatment**

472 For ENU treatment, synchronized L1 larvae were obtained by hypochlorite bleaching and  
473 provided with OP50 as described above. After allowing 2 hours for feeding, the larvae  
474 were incubated in a 15 ml centrifuge tube with the working solution of ENU as described  
475 in [51], except: L1 larvae were used instead of L4 larvae, and the working concentration  
476 of ENU used was 5 mM and 10 mM. Control animals were kept in tubes containing only  
477 M9, next to the ENU tubes.

#### 478 **UV treatment**

479 For UV irradiation, synchronized L1 larvae were similarly obtained by the hypochlorite  
480 bleaching method. Following synchronization, the L1 larvae were dispensed on NGM  
481 plates with a glass Pasteur pipette, and irradiated on plates with 50 J/m<sup>2</sup> or 100J/m<sup>2</sup> of  
482 UV-C in a Stratalinker 1800 UV crosslinker (Stratagene California). Control animals were  
483 kept on plates next to the crosslinker.

#### 484 **Scoring of somatic phenotypes**

485 Following IR, UV, or ENU exposure, animals were transferred onto NGM plates (or left  
486 on the plate if treated on plates), and left to develop for three days (72-76 hours) or four  
487 days (96-100 hours). At those time points, the incidence of somatic phenotypes was  
488 assessed in the following way. Protruding vulva, ruptured through vulva, and larvae were  
489 scored directly on the plate using a Leica MS5 stereomicroscope. A variant method was  
490 used in experiment scoring phenotypes in cross progeny. Here, the animals were isolated  
491 to individual plates as L1 following treatment, and the somatic phenotype scored for each  
492 animal at three and four days after treatment.

493 The proportion of worms showing the Egl phenotype was scored by dissecting individual  
494 animals using hypodermal injection needles (Becton, Dickinson and Company). Animals  
495 were scored as Egl if they contained one or more hatched larvae within their body at time  
496 of dissection (bagging).

#### 497 **Scoring of embryonic lethality**

498 Groups of IR-treated and control animals were moved to a fresh NGM plate 24 hours after  
499 the L4 stage, and moved to a fresh plate two times after that in 8 hour intervals. After 8  
500 hours on the last plate, the animals were removed, leaving three brood plates. The  
501 number of eggs was scored on each plate following the transfer or removal of the animals,  
502 and the number of hatched larvae was counted on each plate ~24 hours after the transfer  
503 or removal of the mothers. For L1 treated animals, 10-12 animals per plate were used  
504 for unirradiated and IR-treated resistant groups, and 20 animals per plate for IR-treated  
505 sensitive groups. For animals treated at L4, 10 animals per plate were used for  
506 unirradiated controls and 12-15 animals were used for IR-treated groups.

#### 507 **CRISPR-Cas9 mutagenesis**

508 CRISPR-Cas9 mutagenesis was performed using the *in vitro* assembled  
509 ribonucleoprotein complex as described [52]. Young adult animals were microinjected the  
510 Cas9/tracrRNA/crRNA/DNA repair template mixture 1 day after L4 stage. The *dpy-*  
511 *10(cn64)* allele was used as a co-conversion marker [53]. Heterozygous *dpy-10(cn64/+)*

512 rollers were isolated from the progeny of injected animals, allowed to lay progeny, then  
513 lysed and genotyped for the mutation of interest. If positive, wild-type moving F2 progeny  
514 was isolated and genotyped for homozygosity of the mutation of interest. TracrRNA and  
515 crRNAs were synthesized by GE Healthcare Dharmacon, Inc. The repair template DNA  
516 oligonucleotides were synthesized by Integrated DNA Technologies, Inc. The Cas9  
517 endonuclease was purchased from PNA Bio Inc. The crRNAs and repair templates used  
518 to create mutations used in this study are listed below.

519 *lig-4* N-term crRNA (DNA target): TTGACGTCTTCAACAAGATT

520 *lig-4(vv134[R18STOP])* repair template:

521 ATGGCGTCAGATGTGATCTTCGACGAAGTAGTTGACGTCTTCAACAAGATTTGACG  
522 GACTTCAAATGTGAAATCAAAGCAAGCAACCTTTCAGAAAACTTTGAATCATGGAA  
523 AG

524 *lig-4* C-term crRNA (DNA target): CGAAGGTGGATTTCGAGATTC

525 *lig-4(vv145[lig-4::OLLAS])* repair template:

526 TGGTTGCCTTCTGATGTGTTTCATGCCATCGAAGGTGGATTTCGAGATTCAGGAATA  
527 CCCATATGATGTCCCGGATTACGCTTAATTTACTAATTTTCGATTATATGTGATATCG  
528 CTCTTTATTTCTTTTT

529 *nhj-1* crRNA (DNA target): CTAGAGCGTACGGAGCTTTC

530 *nhj-1(144)* repair template:

531 TTCCCTCTTCTCTGAAAGTGGCCTTCATATCGAAGAAGTTTGTGAGAAGGAGCTTG  
532 TGCTCACGTTTGCACCTCAAAGAAATATTAGCGTACGGAGCTTCTGGAAGATTCG  
533 ATGAGTGCCTCTACTTGAATATTTGGTGGGTTAAAAAGTT

534 *nhj-1* C-term crRNA (DNA target): ATCGTCAAACCTCTGGTCCAC

535 *nhj-1(vv147[nhj-1::OLLAS])* repair template:

536 TATGGCTGCCAAGGCCAGTGGACCAGAGTTTGACGATGAATCTGGATTTCGCTAAC  
537 GAGCTTGGACCACGCCTTATGGGAAAGTAATTTACAATTAATTAACCCCATCTTTC  
538 TTGTTCCATG

## 539 **Genomic DNA preparation and sequencing**

540 Genomic DNA for deep sequencing was prepared using the Schedl lab protocol  
541 (<http://genetics.wustl.edu/tslab/protocols/genomic-stuff/worm-genomic-dna-prep>).

542 Briefly, 5 medium-sized (10 cm diameter) NGM plates were seeded with 15 L4 animals  
543 and allowed to starve over the course of a week. The arrested L1 larvae were then grown  
544 in liquid NGM 3-4 days until they developed into adults, which were treated with a 30%  
545 sucrose float to remove food contamination and separated into 500  $\mu$ l aliquots, which  
546 were frozen at  $-80^{\circ}\text{C}$ . An aliquot was then transferred to a 15 ml centrifuge tube, 4.5 ml  
547 of worm lysis buffer (0.1M Tris-Cl pH 8.5, 0.1M NaCl, 50 mM EDTA pH 8.0, 1% SDS) and  
548 200  $\mu$ l of Protease K (20 mg/ml in TE pH 8.0) added, and the worms vortexed. The mixture  
549 was incubated for 1 hour at  $62^{\circ}\text{C}$ , with intermittent vortexing. Then, 800  $\mu$ L of 5M NaCl  
550 and was added and the tube mixed by inversion, after which 800  $\mu$ L of CTAB solution (10  
551 % CTAB in 0.7M NaCl) was added and the tube incubated for 10 minutes at  $37^{\circ}\text{C}$ .  
552 Following this, 7 ml of chloroform was added and the tube mixed and spun, the aqueous  
553 phase recovered, and the step repeated with 7 ml phenol/chloroform/isoamyl alcohol.  
554 Next, 0.6 volume of  $-20^{\circ}\text{C}$  isopropyl alcohol was added, and mixed, and the DNA spun at  
555  $4^{\circ}\text{C}$  for 5 minutes. The DNA pellet was washed in 70% ethanol, dried, and resuspended  
556 in 340  $\mu$ l of TE buffer. Next, 10  $\mu$ l of RNase A (10 mg/ml) was added and the tube  
557 incubated for 2 hours at  $42^{\circ}\text{C}$ , following which 20  $\mu$ l of 20 % SDS, 10  $\mu$ l of 0.5 M EDTA  
558 pH 8.0, and 20  $\mu$ l of Protease K was added and the tube incubated for 2 hours at  $65^{\circ}\text{C}$ .  
559 Then, 40  $\mu$ l of 10 M Ammonium Acetate was added, the DNA extracted twice with  
560 phenol/chloroform/isoamyl alcohol and once with chloroform, 1 ml of ethanol added, and  
561 the DNA spun down at  $4^{\circ}\text{C}$  for 10 minutes. The DNA was washed twice with 70% ethanol,  
562 dried, and resuspended in 200  $\mu$ l of TE buffer.

563 Sample paired-end tag libraries were prepared by Canada's Michael Smith Genome  
564 Sciences Centre, and the samples were sequenced with Illumina HiSeq 2500 (125 bp  
565 read length) to a coverage of 100X for N2 [S] and 200X for N2 [R]. The Genome Sciences  
566 Centre also provided the binary alignment (bam) files for both genomes.

## 567 **Bioinformatic analysis**

568 Sequence variants in N2 [S] and N2 [R] were called with SAMtools [54], using the mpileup  
569 function against the WS249\_cel235.fa reference genome. Filtering was performed and  
570 strain-specific variants determined using the somatic variation function in the small variant  
571 caller Strelka2 [55], except the *nhj-1(vv148)* mutation, which was identified by manual  
572 parsing through variants called by SAMtools mpileup. The full sequence of the *nhj-*  
573 *1(vv148)* indel was identified by N2 [S] genome reassembly with ABySS 2.0 [56] from the  
574 sorted bam file.

575 The search for protein sequences homologous to NHJ-1 was conducted with DELTA-  
576 BLAST on the NCBI online tool, <https://blast.ncbi.nlm.nih.gov/Blast.cgi> [57]. NHJ-1  
577 isoform sequences were analyzed for domain conservation by SMART (Simple Molecular  
578 Architecture Research Tool), <http://smart.embl-heidelberg.de> [58]. The hairpin in *nhj-*  
579 *1(vv148)* insertion was predicted using the ViennaRNA package 2.0 [59].

## 580 **Mapping**

581 The mapping of the IR-sensitivity-causative locus (*nhj-1*) was done in two rounds, using  
582 N2 [S]- and N2 [R]-specific molecular markers identified through deep sequencing to  
583 assay marker segregation in F2 hybrid strains originating from an N2 [S] X N2 [R] cross.  
584 In the first, low-resolution mapping round, N2 [S]-specific candidate loci were PCR  
585 amplified and Sanger sequenced at the Genome Quebec center at McGill University  
586 Campus. In the second, high-resolution mapping round, the variants in *F10D2.12* and  
587 *inft-2* were used as RFLPs, with KpnI cutting the [R]-form of *F10D2.12* but not the [S]-  
588 form and TfiI cutting the [R]-form of *inft-2*, but not the [S]-form.

## 589 **Genotyping of the *nhj-1* locus**

590 The wild type *nhj-1* locus and *nhj-1(vv144)* were amplified using the following gene  
591 flanking primers:

592 F: TTGTGTTGAAACTGTACCGTCT; and

593 R: CAAAGTAGTCCCCCTAATCGCA.

594 Digestion of the resulting product with XbaI yields two bands on *nhj-1(+)* but does not cut  
595 *nhj-1(vv144)*. The flanking primer pair does not yield a product with *nhj-1(vv148)*, likely  
596 because of the hairpin present in this allele, and *nhj-1(vv148)* was therefore genotyped  
597 using an alternate reverse primer which anneals in the hairpin section:

598 F: TTGTGTTGAAACTGTACCGTCT; and

599 R: TAATAATATTTTTAATAAATAATAGTAATAT.

## 600 **Immunostaining**

601 Gonad and intestinal immunohistochemistry was performed on dissected organs as  
602 previously described [60], with the following adjustments: dissection was performed in M9  
603 buffer, four washes with PBST preceded the blocking, blocking was done with 1% BSA  
604 in PBST, slides were incubated with primary antibodies at 4°C, slides were washed with  
605 1% BSA PBST four times before addition of secondary antibodies, incubated with  
606 secondary antibodies for 2 hours at room temperature, and washed again four times with  
607 PBST before addition of DAPI in Vectashield mounting medium (Vector Laboratories Inc).

608 Immunohistochemistry of L1 larvae was performed using the freeze-crack method as  
609 described in [61], with the following modifications: slides were left in -20°C for 1 minute,  
610 fixed with 1% formaldehyde in PBST for 5 minutes, washed four times with PBST before  
611 blocking with 1% BSA in PBST, washed four times with 1% BSA in PBST before  
612 secondary antibody incubation, and washed four times with PBST before addition of DAPI  
613 in Vectashield.

614 The primary antibodies and concentrations used in this study are as follows: guinea pig  
615  $\alpha$ -HTP-3 (1:500) [62], rat  $\alpha$ -OLLAS (1:200) (Novus Biologicals, Inc), mouse  $\alpha$ -GFP (1:200)  
616 (Abcam), rabbit  $\alpha$ -H3K9me3 (1:500) (Cell Signaling Technology, Inc), and rabbit  $\alpha$ -  
617 H3K9Ac (1:200) (Cell Signaling Technology, Inc).

618 Secondary antibodies used in this study include: Alexa 488-conjugated  $\alpha$ -guinea pig,  
619 Alexa 488-conjugated  $\alpha$ -mouse, Alexa 555-conjugated  $\alpha$ -rabbit, and Alexa 555-  
620 conjugated  $\alpha$ -rat. All secondary antibodies were purchased from Molecular Probes Inc,  
621 and used at a concentration of 1:1000.

## 622 **Microscopy**

623 All worm manipulations, transfers, and crosses, as well as brood size scoring, somatic  
624 phenotype scoring, embryonic lethality scoring, and worm dissection was performed on  
625 Leica MS5 stereomicroscopes.

626 Example somatic phenotypes shown in **Figure 2** were imaged with a 12-bit QICAM digital  
627 camera (QImaging and Photometrics) on a Leica MZ8 stereomicroscope.

628 Micrographs shown in **Figures 8-12** were acquired with a Leica DMI 6000B inverted  
629 microscope and EM CCD camera C1900 (Hamamatsu Photonics KK). The DAPI signal  
630 was acquired with wide-field X-Cite 120 fluorescence illumination system (Excelitas  
631 Technologies), while the Alexa-488 and Alexa-555 conjugated antibody signals were  
632 acquired with a Quorum WaveFX spinning disc confocal system (Quorum Technologies),  
633 both integrated with the Leica DMI 6000B microscope. Images were acquired in stacks  
634 of 15-40 Z-planes in increments of 0.2  $\mu\text{m}$ . Stack projections and contrast and brightness  
635 adjustments were performed in ImageJ (National Institutes of Health and Laboratory for  
636 Optical and Computational Instrumentation).

## 637 **RNAi of *cku-80***

638 RNAi knockdown of *cku-80* was done according to the standard feeding protocol [63].  
639 Heterozygous *com-1* animals were put on plates containing *cku-80* expressing bacteria  
640 at the L4 stage, and the F1 progeny individually plated on *cku-80* RNAi plates for scoring  
641 of embryonic lethality. Control animals were fed bacteria expressing the empty vector  
642 L4440.

## 643 **Statistical analyses, descriptive statistics, and data presentation**

644 Because of the non-normal distribution observed in the post-IR brood size data, this data  
645 was compared with the non-parametric Kruskal-Wallis H-test [64]. Pairwise comparisons  
646 between individual groups were done by Dunn's post-hoc test [65] or serial Mann-Whitney  
647 U-tests [66] with a Bonferroni correction [67] applied to compensate for multiple testing.



648 Categorical data, including the incidence of post-IR somatic phenotypes and embryonic  
649 lethality, is analyzed by Pearson's Chi-squared test [68], and in cases of multiple  
650 comparisons compared against a Bonferroni-corrected  $\alpha$ -value.

651 Because of the non-normal distribution of the brood size data and the non-parametric  
652 tests used to determine significance, the descriptive statistical metrics used both as error  
653 bars in the figures and reported in the text are the median and the interquartile range,  
654 rather than the mean and standard deviation.

655 All statistical tests were performed in GraphPad Prism 5 (GraphPad Software Inc).  
656 Vertical scatter plots were generated in GraphPad Prism 5, and 100% stacked column  
657 bar graphs were generated in Microsoft Excel (Microsoft Corporation).

## 658 **Acknowledgements**

659 This work was supported by funding from the Canadian Institute of Health Research  
660 (201109) and the Natural Sciences and Engineering Council (RGPIN-2018-05963) to MZ.  
661 We would like to thank Florence Couteau and members of the Zetka laboratory for helpful  
662 discussions and Sara Labella for experimental support. We are grateful to Anja Bošković,  
663 Maia Kaplan, and Harwood Kwan for bioinformatic data analysis. Some strains were  
664 provided by the CGC, which is funded by the NIH Office of Research Infrastructure  
665 Programs (P40 OD010440). We would also like to thank Erik Andersen, Siegfried Hekimi,  
666 Mei Zhen, and the National Bioresource Project (Japan) for strains, and the Roy  
667 Laboratory for strains, reagents, and critical discussions during the course of this work.

668

## References

- 669 1. Chang, H.H.Y., Pannunzio, N.R., Adachi, N., and Lieber, M.R. (2017). Non-  
670 homologous DNA end joining and alternative pathways to double-strand break  
671 repair. *Nat Rev Mol Cell Biol* 18, 495-506.
- 672 2. Betermier, M., Bertrand, P., and Lopez, B.S. (2014). Is non-homologous end-  
673 joining really an inherently error-prone process? *PLoS Genet* 10, e1004086.
- 674 3. Ceccaldi, R., Rondinelli, B., and D'Andrea, A.D. (2016). Repair Pathway Choices  
675 and Consequences at the Double-Strand Break. *Trends Cell Biol* 26, 52-64.
- 676 4. Li, J., and Xu, X.Z. (2016). DNA double-strand break repair: a tale of pathway  
677 choices. *Acta Bioch Bioph Sin* 48, 641-646.
- 678 5. Decottignies, A. (2013). Alternative end-joining mechanisms: a historical  
679 perspective. *Front Genet* 4, 48.
- 680 6. Sallmyr, A., and Tomkinson, A.E. (2018). Repair of DNA double-strand breaks by  
681 mammalian alternative end-joining pathways. *Journal of Biological Chemistry*  
682 293, 10536-10546.
- 683 7. Iliakis, G., Murmann, T., and Soni, A. (2015). Alternative end-joining repair  
684 pathways are the ultimate backup for abrogated classical non-homologous end-  
685 joining and homologous recombination repair: Implications for the formation of  
686 chromosome translocations. *Mutat Res-Gen Tox En* 793, 166-175.
- 687 8. Wang, C., and Lees-Miller, S.P. (2013). Detection and repair of ionizing radiation-  
688 induced DNA double strand breaks: new developments in nonhomologous end  
689 joining. *Int J Radiat Oncol Biol Phys* 86, 440-449.
- 690 9. Davis, A.J., and Chen, D.J. (2013). DNA double strand break repair via non-  
691 homologous end-joining. *Transl Cancer Res* 2, 130-143.
- 692 10. Radhakrishnan, S.K., Jette, N., and Lees-Miller, S.P. (2014). Non-homologous  
693 end joining: Emerging themes and unanswered questions. *DNA Repair* 17, 2-8.
- 694 11. Lieber, M.R. (2008). The mechanism of human nonhomologous DNA end joining.  
695 *Journal of Biological Chemistry* 283, 1-5.

- 696 12. Gu, J., and Lieber, M.R. (2008). Mechanistic flexibility as a conserved theme  
697 across 3 billion years of nonhomologous DNA end-joining. *Genes Dev* 22, 411-  
698 415.
- 699 13. Manova, V., and Gruszka, D. (2015). DNA damage and repair in plants - from  
700 models to crops. *Frontiers in Plant Science* 6.
- 701 14. Daley, J.M., Palmboos, P.L., Wu, D., and Wilson, T.E. (2005). Nonhomologous  
702 end joining in yeast. *Annu Rev Genet* 39, 431-451.
- 703 15. Sekelsky, J. (2017). DNA Repair in *Drosophila*: Mutagens, Models, and Missing  
704 Genes. *Genetics* 205, 471-490.
- 705 16. Lemmens, B.B.L.G., and Tijsterman, M. (2011). DNA double-strand break repair  
706 in *Caenorhabditis elegans*. *Chromosoma* 120, 1-21.
- 707 17. Clejan, I., Boerckel, J., and Ahmed, S. (2006). Developmental modulation of  
708 nonhomologous end joining in *Caenorhabditis elegans*. *Genetics* 173, 1301-  
709 1317.
- 710 18. Brady, S.C., Zdraljevic, S., Bisaga, K.W., Tanny, R.E., Cook, D.E., Lee, D.,  
711 Wang, Y., and Andersen, E.C. (2019). A Novel Gene Underlies Bleomycin-  
712 Response Variation in *Caenorhabditis elegans*. *Genetics* 212, 1453-1468.
- 713 19. Povirk, L.F. (1996). DNA damage and mutagenesis by radiomimetic DNA-  
714 cleaving agents: bleomycin, neocarzinostatin and other enediynes. *Mutat Res*  
715 355, 71-89.
- 716 20. Barriere, A., and Felix, M.A. (2005). High local genetic diversity and low  
717 outcrossing rate in *Caenorhabditis elegans* natural populations. *Curr Biol* 15,  
718 1176-1184.
- 719 21. Sulston, J.E., and Horvitz, H.R. (1977). Post-embryonic cell lineages of the  
720 nematode, *Caenorhabditis elegans*. *Dev Biol* 56, 110-156.
- 721 22. Acevedo-Arozena, A., Wells, S., Potter, P., Kelly, M., Cox, R.D., and Brown, S.D.  
722 (2008). ENU mutagenesis, a way forward to understand gene function. *Annu Rev*  
723 *Genomics Hum Genet* 9, 49-69.
- 724 23. Rastogi, R.P., Richa, Kumar, A., Tyagi, M.B., and Sinha, R.P. (2010). Molecular  
725 Mechanisms of Ultraviolet Radiation-Induced DNA Damage and Repair. *J*  
726 *Nucleic Acids*.

- 727 24. Sarov, M., Murray, J.I., Schanze, K., Pozniakovski, A., Niu, W., Angermann, K.,  
728 Hasse, S., Rupprecht, M., Vinis, E., Tinney, M., et al. (2012). A genome-scale  
729 resource for in vivo tag-based protein function exploration in *C. elegans*. *Cell*  
730 *150*, 855-866.
- 731 25. Lemmens, B.B.L.G., Johnson, N.M., and Tijsterman, M. (2013). COM-1  
732 Promotes Homologous Recombination during *Caenorhabditis elegans* Meiosis by  
733 Antagonizing Ku-Mediated Non-Homologous End Joining. *Plos Genetics* *9*.
- 734 26. Hunter, N. (2015). Meiotic Recombination: The Essence of Heredity. *Cold Spring*  
735 *Harb Perspect Biol* *7*.
- 736 27. Park, S.H., Cheong, C., Idoyaga, J., Kim, J.Y., Choi, J.H., Do, Y., Lee, H., Jo,  
737 J.H., Oh, Y.S., Im, W., et al. (2008). Generation and application of new rat  
738 monoclonal antibodies against synthetic FLAG and OLLAS tags for improved  
739 immunodetection. *J Immunol Methods* *331*, 27-38.
- 740 28. Francis, D.B., Kozlov, M., Chavez, J., Chu, J., Malu, S., Hanna, M., and Cortes,  
741 P. (2014). DNA Ligase IV regulates XRCC4 nuclear localization. *DNA Repair*  
742 *(Amst)* *21*, 36-42.
- 743 29. Flibotte, S., Edgley, M.L., Chaudhry, I., Taylor, J., Neil, S.E., Rogula, A., Zapf, R.,  
744 Hirst, M., Butterfield, Y., Jones, S.J., et al. (2010). Whole-genome profiling of  
745 mutagenesis in *Caenorhabditis elegans*. *Genetics* *185*, 431-441.
- 746 30. Woodbine, L., Gennery, A.R., and Jeggo, P.A. (2014). The clinical impact of  
747 deficiency in DNA non-homologous end-joining. *DNA Repair (Amst)* *16*, 84-96.
- 748 31. Hammel, M., Rey, M., Yu, Y., Mani, R.S., Classen, S., Liu, M., Pique, M.E., Fang,  
749 S., Mahaney, B.L., Weinfeld, M., et al. (2011). XRCC4 protein interactions with  
750 XRCC4-like factor (XLF) create an extended grooved scaffold for DNA ligation  
751 and double strand break repair. *J Biol Chem* *286*, 32638-32650.
- 752 32. Mahaney, B.L., Hammel, M., Meek, K., Tainer, J.A., and Lees-Miller, S.P. (2013).  
753 XRCC4 and XLF form long helical protein filaments suitable for DNA end  
754 protection and alignment to facilitate DNA double strand break repair. *Biochem*  
755 *Cell Biol* *91*, 31-41.
- 756 33. Koike, M., Shiomi, T., and Koike, A. (2001). Dimerization and nuclear localization  
757 of ku proteins. *J Biol Chem* *276*, 11167-11173.

- 758 34. Koike, M., Awaji, T., Kataoka, M., Tsujimoto, G., Kartasova, T., Koike, A., and  
759 Shiomi, T. (1999). Differential subcellular localization of DNA-dependent protein  
760 kinase components Ku and DNA-PKcs during mitosis. *J Cell Sci* 112, 4031-4039.
- 761 35. Nilsson, A., Sirzen, F., Lewensohn, R., Wang, N., and Skog, S. (1999). Cell  
762 cycle-dependent regulation of the DNA-dependent protein kinase. *Cell Prolif* 32,  
763 239-248.
- 764 36. Girard, P.M., Kysela, B., Harer, C.J., Doherty, A.J., and Jeggo, P.A. (2004).  
765 Analysis of DNA ligase IV mutations found in LIG4 syndrome patients: the impact  
766 of two linked polymorphisms. *Hum Mol Genet* 13, 2369-2376.
- 767 37. Mari, P.O., Florea, B.I., Persengiev, S.P., Verkaik, N.S., Brueggenwirth, H.T.,  
768 Modesti, M., Giglia-Mari, G., Bezstarosti, K., Demmers, J.A.A., Luiders, T.M., et al.  
769 (2006). Dynamic assembly of end-joining complexes requires interaction  
770 between Ku70/80 and XRCC4. *P Natl Acad Sci USA* 103, 18597-18602.
- 771 38. Koike, M., Yutoku, Y., and Koike, A. (2015). Dynamic changes in subcellular  
772 localization of cattle XLF during cell cycle, and focus formation of cattle XLF at  
773 DNA damage sites immediately after irradiation. *J Vet Med Sci* 77, 1109-1114.
- 774 39. Ochi, T., Blackford, A.N., Coates, J., Jhujh, S., Mehmood, S., Tamura, N.,  
775 Travers, J., Wu, Q., Draviam, V.M., Robinson, C.V., et al. (2015). DNA repair.  
776 PAXX, a paralog of XRCC4 and XLF, interacts with Ku to promote DNA double-  
777 strand break repair. *Science* 347, 185-188.
- 778 40. Yurchenko, V., Xue, Z., and Sadofsky, M.J. (2006). SUMO modification of human  
779 XRCC4 regulates its localization and function in DNA double-strand break repair.  
780 *Mol Cell Biol* 26, 1786-1794.
- 781 41. Mazzarelli, P., Parrella, P., Seripa, D., Signori, E., Perrone, G., Rabitti, C.,  
782 Borzomati, D., Gabbrielli, A., Matera, M.G., Gravina, C., et al. (2005). DNA end  
783 binding activity and Ku70/80 heterodimer expression in human colorectal tumor.  
784 *World J Gastroenterol* 11, 6694-6700.
- 785 42. Jun, S., Jung, Y.S., Suh, H.N., Wang, W., Kim, M.J., Oh, Y.S., Lien, E.M., Shen,  
786 X., Matsumoto, Y., McCrea, P.D., et al. (2016). LIG4 mediates Wnt signalling-  
787 induced radioresistance. *Nat Commun* 7, 10994.

- 788 43. Ahmed, E.A., Sfeir, A., Takai, H., and Scherthan, H. (2013). Ku70 and non-  
789 homologous end joining protect testicular cells from DNA damage. *J Cell Sci* *126*,  
790 3095-3104.
- 791 44. Adamo, A., Collis, S.J., Adelman, C.A., Silva, N., Horejsi, Z., Ward, J.D.,  
792 Martinez-Perez, E., Boulton, S.J., and La Volpe, A. (2010). Preventing  
793 nonhomologous end joining suppresses DNA repair defects of Fanconi anemia.  
794 *Mol Cell* *39*, 25-35.
- 795 45. Smolikov, S., Eizinger, A., Hurlburt, A., Rogers, E., Villeneuve, A.M., and  
796 Colaiacovo, M.P. (2007). Synapsis-Defective mutants reveal a correlation  
797 between chromosome conformation and the mode of double-strand break repair  
798 during *Caenorhabditis elegans* meiosis. *Genetics* *176*, 2027-2033.
- 799 46. Hedgecock, E.M., and White, J.G. (1985). Polyploid tissues in the nematode  
800 *Caenorhabditis elegans*. *Dev Biol* *107*, 128-133.
- 801 47. Jiang, H., and Wang, D. (2018). The Microbial Zoo in the *C. elegans* Intestine:  
802 Bacteria, Fungi and Viruses. *Viruses* *10*.
- 803 48. Brenner, S. (1974). The genetics of *Caenorhabditis elegans*. *Genetics* *77*, 71-94.
- 804 49. Stiernagle, T. (2006). Maintenance of *C. elegans*. *WormBook*, 1-11.
- 805 50. Porta-de-la-Riva, M., Fontrodona, L., Villanueva, A., and Ceron, J. (2012). Basic  
806 *Caenorhabditis elegans* methods: synchronization and observation. *J Vis Exp*,  
807 e4019.
- 808 51. Kutscher, L.M., and Shaham, S. (2014). Forward and reverse mutagenesis in *C.*  
809 *elegans*. *WormBook*, 1-26.
- 810 52. Paix, A., Folkmann, A., Rasoloson, D., and Seydoux, G. (2015). High Efficiency,  
811 Homology-Directed Genome Editing in *Caenorhabditis elegans* Using CRISPR-  
812 Cas9 Ribonucleoprotein Complexes. *Genetics* *201*, 47-+.
- 813 53. Arribere, J.A., Bell, R.T., Fu, B.X., Artiles, K.L., Hartman, P.S., and Fire, A.Z.  
814 (2014). Efficient marker-free recovery of custom genetic modifications with  
815 CRISPR/Cas9 in *Caenorhabditis elegans*. *Genetics* *198*, 837-846.
- 816 54. Li, H., Handsaker, B., Wysoker, A., Fennell, T., Ruan, J., Homer, N., Marth, G.,  
817 Abecasis, G., Durbin, R., and Genome Project Data Processing, S. (2009). The  
818 Sequence Alignment/Map format and SAMtools. *Bioinformatics* *25*, 2078-2079.

- 819 55. Kim, S., Scheffler, K., Halpern, A.L., Bekritsky, M.A., Noh, E., Kallberg, M., Chen,  
820 X., Kim, Y., Beyter, D., Krusche, P., et al. (2018). Strelka2: fast and accurate  
821 calling of germline and somatic variants. *Nat Methods* 15, 591-594.
- 822 56. Jackman, S.D., Vandervalk, B.P., Mohamadi, H., Chu, J., Yeo, S., Hammond,  
823 S.A., Jahesh, G., Khan, H., Coombe, L., Warren, R.L., et al. (2017). ABySS 2.0:  
824 resource-efficient assembly of large genomes using a Bloom filter. *Genome Res*  
825 27, 768-777.
- 826 57. Boratyn, G.M., Schaffer, A.A., Agarwala, R., Altschul, S.F., Lipman, D.J., and  
827 Madden, T.L. (2012). Domain enhanced lookup time accelerated BLAST. *Biol*  
828 *Direct* 7, 12.
- 829 58. Letunic, I., and Bork, P. (2018). 20 years of the SMART protein domain  
830 annotation resource. *Nucleic Acids Res* 46, D493-D496.
- 831 59. Lorenz, R., Bernhart, S.H., Honer Zu Siederdissen, C., Tafer, H., Flamm, C.,  
832 Stadler, P.F., and Hofacker, I.L. (2011). ViennaRNA Package 2.0. *Algorithms Mol*  
833 *Biol* 6, 26.
- 834 60. Martinez-Perez, E., and Villeneuve, A.M. (2005). HTP-1-dependent constraints  
835 coordinate homolog pairing and synapsis and promote chiasma formation during  
836 *C. elegans* meiosis. *Genes Dev* 19, 2727-2743.
- 837 61. Butuci, M., Williams, A.B., Wong, M.M., Kramer, B., and Michael, W.M. (2015).  
838 Zygotic Genome Activation Triggers Chromosome Damage and Checkpoint  
839 Signaling in *C. elegans* Primordial Germ Cells. *Dev Cell* 34, 85-95.
- 840 62. Goodyer, W., Kaitna, S., Couteau, F., Ward, J.D., Boulton, S.J., and Zetka, M.  
841 (2008). HTP-3 links DSB formation with homolog pairing and crossing over  
842 during *C. elegans* meiosis. *Dev Cell* 14, 263-274.
- 843 63. Conte, D., Jr., MacNeil, L.T., Walhout, A.J., and Mello, C.C. (2015). RNA  
844 Interference in *Caenorhabditis elegans*. *Curr Protoc Mol Biol* 109, 26 23 21-30.
- 845 64. Kruskal, W.H., and Wallis, W.A. (1952). Use of Ranks in One-Criterion Variance  
846 Analysis. *J Am Stat Assoc* 47, 583-621.
- 847 65. Dunn, O.J. (1964). Multiple Comparisons Using Rank Sums. *Technometrics* 6,  
848 241-&.

- 849 66. Mann, H.B., and Whitney, D.R. (1947). On a Test of Whether One of 2 Random  
850 Variables Is Stochastically Larger Than the Other. *Ann Math Stat* 18, 50-60.
- 851 67. Shaffer, J.P. (1995). Multiple Hypothesis-Testing. *Annu Rev Psychol* 46, 561-  
852 584.
- 853 68. Pearson, K. (1900). On the Criterion that a given System of Deviations from the  
854 Probable in the Case of a Correlated System of Variables is such that it can be  
855 reasonably supposed to have arisen from Random Sampling. *Philos Mag* 50,  
856 157-175.



## 857 **Figure Legends**

### 858 **Figure 1. N2 [R] and N2 [S] show a dose-dependent, stage- and stressor-specific** 859 **difference in brood size following treatment with ionizing radiation**

860 **(A)** Multi-dose brood size quantification of N2 [R] and N2 [S] post-L1 IR treatment. The  
861 IR-sensitive N2 [S] line shows a significantly reduced brood size compared to unirradiated  
862 animals at 25 Gy ( $p < 0.01$ ), 50 Gy ( $p < 0.001$ ), and 75 Gy ( $p < 0.001$ ). Irradiated N2 [R]  
863 animals show a significantly reduced brood size compared to unirradiated controls only  
864 at 75 Gy ( $p < 0.001$ ). At every tested IR dose, N2 [S] is significantly more severely affected  
865 than N2 [R]. All statistical comparisons shown in the figure are to N2 [R] at the equivalent  
866 IR dose (Kruskal-Wallis test and Dunn's post-hoc tests). Error bars represent the median  
867 and interquartile range. Sample size ( $n$ ) is 46 for unirradiated N2 [R], 45 for N2 [R] 25 Gy,  
868 47 for N2 [R] 50 Gy, 48 for N2 [R] 75 Gy, 44 for unirradiated N2 [S], 48 for N2 [S] 25 Gy,  
869 46 for N2 [S] 50 Gy, and 49 for N2 [S] 75 Gy.

870 **(B)** Brood size quantification of N2 [R] and N2 [S] post-L4 IR treatment. Both N2 [S] and  
871 N2 [R] animals show a reduced brood size in adulthood ( $p < 0.001$  vs unirradiated  
872 controls), but there is no significant difference between the two backgrounds, suggesting  
873 that the IR-sensitivity of N2 [S] is specific to the L1 stage. All statistical comparisons  
874 shown in the figure are to N2 [R] at the equivalent IR dose (Kruskal-Wallis test and Dunn's  
875 post-hoc tests). Error bars represent the median and interquartile range. Sample size ( $n$ )  
876 is 29 for both N2 [R] groups, and 30 for both N2 [S] groups.

877 **(C)** Brood size quantification of N2 [R] and N2 [S] post-L1 ENU treatment. Both N2 [S]  
878 and N2 [R] animals show a dose-dependent reduction in brood size ( $p < 0.01$  for 5mM ENU  
879 and  $p < 0.001$  for 10mM ENU for N2 [R] versus untreated control;  $p < 0.001$  for both 5mM  
880 and 10mM ENU for N2 [S] versus untreated control), but there is no significant difference  
881 between the two backgrounds at the doses tested. All statistical comparisons shown in  
882 the figure are to N2 [R] at the equivalent ENU dose (Kruskal-Wallis test and Dunn's post-  
883 hoc tests). Error bars represent the median and interquartile range. Sample size ( $n$ ) is 29  
884 for N2 [S] 5mM ENU, and 30 for all other groups.

885 **(D)** Brood size quantification of N2 [R] and N2 [S] post-L1 UV treatment. Both N2 [S] and  
886 N2 [R] animals show a reduction in adult brood size ( $p < 0.001$  versus unirradiated controls  
887 for both genotypes), but there is no significant difference between the two backgrounds.  
888 At the higher of the two tested doses,  $100 \text{ J/m}^2$ , animals of both backgrounds exhibit  
889 terminal larval arrest and do not produce progeny. All statistical comparisons shown in  
890 the figure are to N2 [R] at the equivalent ENU dose (Kruskal-Wallis test and Dunn's post-  
891 hoc tests). Error bars represent the median and interquartile range. Sample size (n) is 28  
892 for unirradiated N2 [R], 29 for unirradiated N2 [S], and 30 for all other groups. ns = not  
893 significant ( $p > 0.05$ ); \* =  $p < 0.05$ ; \*\* =  $p < 0.01$ ; \*\*\* =  $p < 0.001$

894

## 895 **Figure 2. N2 [S] displays several distinct somatic phenotypes post-IR**

896 **(A)** Quantification of growth delay and vulval phenotypes three days after IR treatment at  
897 the L1 stage. When irradiated at 75 Gy of IR, N2 [S] animals show a developmental delay,  
898 as a large proportion is still in the L4 stage when all unirradiated controls and almost all  
899 irradiated N2 [R] animals have developed into adults. A small proportion of irradiated N2  
900 [S] animals develops into thin, whitish larvae approximately the size of L3 larvae (Thin).  
901 The majority of irradiated N2 [S] animals that does develop into adults by this stage  
902 exhibits vulval phenotypes, most prominently protruding vulva (Pvl) and ruptured through  
903 vulva (Rup). The statistical comparison shown in the figure is to irradiated N2 [R] (Chi-  
904 squared test). Sample size (n) is 148 for unirradiated N2 [R], 111 for irradiated N2 [R],  
905 141 for unirradiated N2 [S], and 118 for irradiated N2 [S].

906 **(B)** Quantification of the same phenotypes as in **(A)**, four days after treatment at L1 stage.  
907 Four days after irradiation with 75 Gy of IR, almost all N2 [S] animals develop into adults,  
908 but exhibit a high incidence of Pvl and Rup phenotypes, as well as occasional thin, whitish  
909 larvae. The statistical comparison shown in the figure is to irradiated N2 [R] (Chi-squared  
910 test). Sample size (n) is 109 for unirradiated N2 [R], 148 for irradiated N2 [R], 134 for  
911 unirradiated N2 [S], and 142 for irradiated N2 [S].

912 **(C)** Representative images of phenotypes quantified in (A) and (B). Black arrows point to  
913 the protruding vulva in the "Pvl" panel and the burst vulva and partial extrusion of internal  
914 organs in the "Rup" panel.

915 **(D)** Quantification of the Egl phenotype in irradiated and control animals. While a small  
916 proportion of N2 [R] animals develops the Egl phenotype, it is significantly more common  
917 in N2 [S] animals. The statistical comparisons shown in the figure are to irradiated N2 [R]  
918 at the equivalent time points (Chi-squared test).

919 N2 [R] = resistant N2 strain, derived from Andersen lab N2  
920 ns = not significant ( $p > 0.01$ ); \* =  $p < 0.05$ , \*\*\* =  $p < 0.001$

921

### 922 **Figure 3. IR-resistance is dominant to IR-sensitivity**

923 **(A)** Total brood size quantification in N2 [S/S] homozygotes and N2 [R/S] heterozygotes  
924 after 50 Gy of IR at the L1 stage. N2 [S/S] show a significantly lower post-IR brood size  
925 than N2 [R/S] heterozygotes, demonstrating that IR-sensitivity is a recessive trait. The  
926 statistical comparison shown in the figure is to irradiated N2 [R/S] heterozygotes (Kruskal-  
927 Wallis test, followed by Dunn's post-hoc test). Error bars represent the median and  
928 interquartile range. Sample size (n) is 25 for both unirradiated groups and 39 for both  
929 irradiated groups.

930 **(B)** Quantification of somatic phenotypes four days after IR treatment at the L1 stage.  
931 Irradiated N2 [S/S] homozygotes show a significantly higher incidence of Pvl and Rup  
932 phenotypes than N2 [R/S] heterozygotes, corroborating the conclusion that IR-sensitivity  
933 is recessive to IR-resistance. The statistical comparison shown in the figure is to irradiated  
934 N2 [R] (Chi-squared test). Sample size (n) is 25 for both unirradiated groups, 34 for  
935 irradiated N2 [S/S] homozygotes, and 39 for irradiated N2 [R/S] heterozygotes. \*\*\* =  
936  $p < 0.001$

937

### 938 **Figure 4. The structure of NHJ-1**

939 **(A)** The structure of the coding region of *nhj-1/H19N07.3*. The uncharacterized gene  
940 *H19N07.3*, which I have named *nhj-1* (non-homologous end joining 1), is composed of  
941 four exonic regions and three introns. A shorter protein isoform can be translated from an  
942 alternate start codon in exon 2. In the N2 [S] background, exon 3 of *nhj-1* has been

943 disrupted by a deletion of 5 nucleotides, and a 115 bp insertion composed of 107  
944 nucleotides of unknown origin (see **(B)**) and 8 nucleotides duplicated from the exonic  
945 sequence. I have designated this mutation *nhj-1(vv148)*. To test the role of *nhj-1* in IR-  
946 sensitivity, I used CRISPR mutagenesis to delete 7 nucleotides from Exon 3 and create  
947 the *nhj-1(vv144)* allele.

948 **(B)** The predicted hairpin secondary structure of the 107 bp insertion in the *nhj-1(vv148)*  
949 allele using the RNAfold tool of the ViennaRNA Package.

950 **(C)** The predicted protein sequences of NHJ-1. The wild-type long isoform of the NHJ-1  
951 protein is 168 amino acids long, with no conserved domains. The shorter isoform is 130  
952 residues in length. The *nhj-1(vv148)* indel results in truncated protein products of  
953 93<sup>long</sup>/55<sup>short</sup> amino acids in total length, with a frameshift producing 3 missense residues  
954 after residue 90<sup>long</sup>/52<sup>short</sup>. The *nhj-1(vv144)* deletion results in a frameshift after residue  
955 89<sup>long</sup>/51<sup>short</sup>, which creates a downstream sequence of 22 missense residues before  
956 terminating in a stop codon, and produces final products 111<sup>long</sup>/73<sup>short</sup> amino acids long.

957

## 958 **Figure 5. Loss of *nhj-1* in the N2 [R] background results in IR-sensitivity**

959 **(A)** Total brood size quantification of N2 [R], N2 [S], and *nhj-1(vv144)*. While the *nhj-*  
960 *1(vv144)* deletion has no effect on untreated brood size ( $p>0.05$  against both N2 [R] and  
961 N2 [S]), it significantly reduces the post-IR brood size of N2 [R] background compared  
962 ( $p<0.001$  vs N2 [R] post-IR) to the same level as that of N2 [S] ( $p>0.05$ ). All statistical  
963 comparisons shown in the figure are to *nhj-1(vv144)* from the corresponding treatment  
964 group (Kruskal-Wallis test, followed by Dunn's post-hoc test). Error bars represent the  
965 median and interquartile range. Sample size (n) is 30 for all unirradiated groups, 50 for  
966 irradiated N2 [R] and irradiated *nhj-1(vv144)*, and 49 for irradiated N2 [S].

967 **(B)** Quantification of post-IR somatic phenotypes three days after IR treatment in the  
968 same groups as in **(A)**. Three days after IR treatment, *nhj-1(vv144)* mutants show a strong  
969 Gro phenotype, with almost all animals still in the L4 stage, like in N2 [S] ( $p>0.05$ ), but  
970 significantly different than N2 [R] ( $p<0.001$ ) in which all animals have molted into adults.  
971 All statistical comparisons shown in the figure are to irradiated *nhj-1(vv144)* (Chi-squared

972 test, Bonferroni corrected for multiple comparisons to  $\alpha = 0.01$ ). Sample size (n) is 195  
973 for unirradiated N2 [R], 161 for irradiated N2 [R], 252 for unirradiated N2 [S], 163 for  
974 irradiated N2 [S], 240 for unirradiated *nhj-1(vv144)*, and 163 for irradiated *nhj-1(vv144)*.

975 **(C)** Total brood size quantification of N2 [R], N2 [S], and N2 [S]/*nhj-1(vv144)* and N2  
976 [R]/*nhj-1(vv144)* heterozygotes. The post-IR brood size of N2 [S]/*nhj-1(vv144)*  
977 heterozygotes is not significantly different than that of post-IR N2 [S] animals ( $p > 0.05$ ),  
978 while both are significantly reduced compared to the post-IR brood size of either N2 [R]  
979 animals or N2 [R]/*nhj-1(vv144)* heterozygotes ( $p < 0.001$  for both comparisons), indicating  
980 that the IR-sensitivity of the N2 [S] line is caused by a loss of function in *nhj-1*. All statistical  
981 comparisons shown in the figure are to N2 [S]/*nhj-1(vv144)* heterozygotes from the  
982 corresponding treatment group (Kruskal-Wallis test, followed by Dunn's post-hoc test).  
983 Error bars represent the median and interquartile range. Sample size (n) is 29 for  
984 unirradiated N2 [R], 44 for irradiated N2 [R], 30 for unirradiated N2 [S], 48 for irradiated  
985 N2 [S], 30 for unirradiated N2 [S]/*nhj-1* heterozygote, 68 for irradiated N2 [S]/*nhj-1(vv144)*  
986 heterozygote, 30 for unirradiated N2 [R]/*nhj-1* heterozygote, and 50 for irradiated N2  
987 [R]/*nhj-1(vv144)* heterozygote.

988 **(D)** Quantification of post-IR somatic phenotypes three days after IR treatment in the  
989 same groups as in **(C)**. The incidence of Gro and vulval phenotypes is not significantly  
990 different between N2 [S]/*nhj-1(vv144)* heterozygotes and N2 [S] animals after irradiation  
991 ( $p > 0.05$ ), while these phenotypes are significantly less common in post-IR N2 [R] animals  
992 and N2 [R]/*nhj-1(vv144)* heterozygotes ( $p > 0.001$  against both groups). All statistical  
993 comparisons shown in the figure are to N2 [S]/*nhj-1(vv144)* heterozygotes from the  
994 corresponding treatment group (Chi-squared test, Bonferroni corrected for multiple  
995 comparisons to  $\alpha = 0.008$ ). Sample size (n) is 28 for unirradiated N2 [R], 44 for irradiated  
996 N2 [R], 29 for unirradiated N2 [S], 49 for irradiated N2 [S], 30 for unirradiated N2 [S]/*nhj-*  
997 *1* heterozygote, 69 for irradiated N2 [S]/*nhj-1(vv144)* heterozygote, 30 for unirradiated N2  
998 [R]/*nhj-1* heterozygote, and 50 for irradiated N2 [R]/*nhj-1(vv144)*. ns = not significant  
999 ( $p > 0.05$  in **(A, C)**;  $p > 0.01$  in **(B)**;  $p > 0.008$  in **(D)**), \*\*\* =  $p < 0.001$

1000

1001 **Figure 6. Extrachromosomal *nhj-1* rescues both brood size and somatic IR**  
1002 **phenotypes of *nhj-1(vv144)***

1003 **(A)** Total brood size quantification of *nhj-1(vv144)* and *nhj-1(vv144); unc-119(ed3)*  
1004 *goeEx386*. The post-IR brood size of *nhj-1(vv144); unc-119(ed3) goeEx386* animals, in  
1005 which the *nhj-1(vv144)* allele and the *unc-119(ed3)* allele have been rescued by and  
1006 extrachromosomal array carrying a GFP-tagged copy of wild type *nhj-1* and a wild type  
1007 copy of *unc-119*, is significantly higher than that of *nhj-1(vv144)* animals ( $p < 0.005$ ), and  
1008 is also reduced compared to unirradiated *nhj-1(vv144); unc-119(ed3) goeEx386* controls.  
1009 Extrachromosomal *nhj-1* is thus able to rescue the post-IR brood size phenotype of *nhj-*  
1010 *1(vv144)*. All statistical comparisons shown in the figure are to irradiated *nhj-1(vv144);*  
1011 *unc-119(ed3) goeEx386* animals (Kruskal-Wallis test, followed by Dunn's post-hoc test).  
1012 Error bars represent the median and interquartile range. Sample size (n) is 50 for all  
1013 groups.

1014 **(B)** Quantification of post-IR somatic phenotypes three days after IR treatment in the  
1015 same groups as in **(A)**. The Gro and vulval phenotypes are significantly less prevalent in  
1016 irradiated *nhj-1(vv144); unc-119(ed3) goeEx386* animals compared to the irradiated *nhj-*  
1017 *1(vv144)* group ( $< 0.001$ ), showing that exogenous *nhj-1* rescues the post-IR defects of  
1018 *nhj-1(144)*. The statistical comparison shown in the figure is to irradiated *nhj-1(vv144);*  
1019 *unc-119(ed3) goeEx386* animals (Chi-squared test, Bonferroni corrected for multiple  
1020 comparisons to  $\alpha = 0.008$ ). Sample size (n) is 220 for unirradiated *nhj-1(vv144)* NR, 130  
1021 for irradiated *nhj-1(vv144)*, 70 for unirradiated *nhj-1(vv144); unc-119(ed3) goeEx386*, and  
1022 93 for irradiated *nhj-1(vv144); unc-119(ed3) goeEx386*.

1023 **(C)** Total brood size quantification of *nhj-1(vv148); unc-119(ed3)/+* and *nhj-1(vv148); unc-*  
1024 *119(ed3)/+ goeEx386*. In *nhj-1(vv148); unc-119(ed3)/+ goeEx386* animals, the post-IR  
1025 brood size is significantly rescued compared to *nhj-1(vv148); unc-119(ed3)/+* animals  
1026 which do not carry the rescuing transgene ( $p < 0.05$ ), corroborating the conclusion that  
1027 extrachromosomal *nhj-1* can rescue a lack of endogenous *nhj-1*. All statistical  
1028 comparisons shown in the figure are to irradiated *nhj-1(vv148); unc-119(ed3)/+ goeEx386*  
1029 animals (Kruskal-Wallis test, followed by Dunn's post-hoc test). Error bars represent the  
1030 median and interquartile range. Sample size (n) is 18 for both unirradiated groups, 24 for

1031 irradiated *nhj-1(vv148); unc-119(ed3)/+*, and 30 for irradiated *nhj-1(vv148); unc-*  
1032 *119(ed3)/+ goeEx386*.

1033 **(D)** Quantification of post-IR somatic phenotypes three days after IR treatment in the  
1034 same groups as in **(C)**. Vulval phenotypes and slow growth have a lower incidence in  
1035 irradiated *nhj-1(vv148); unc-119(ed3)/+ goeEx386* animals compared to irradiated *nhj-*  
1036 *1(vv148); unc-119(ed3)/+* animals (<0.001), in line with the brood size results. The  
1037 statistical comparison shown in the figure is to irradiated *nhj-1(vv148); unc-119(ed3)/+*;  
1038 *goeEx386* animals (Chi-squared test, Bonferroni corrected for multiple comparisons to  $\alpha$   
1039 = 0.008). Sample size (n) is 18 for unirradiated *nhj-1(vv148); unc-119(ed3)/+*, 19 for  
1040 unirradiated *nhj-1(vv148); unc-119(ed3)/+ goeEx386*, 23 for irradiated *nhj-1(vv148); unc-*  
1041 *119(ed3)/+*, and 30 for irradiated *nhj-1(vv148); unc-119(ed3)/+ goeEx386*. n ns = not  
1042 significant ( $p > 0.05$  in **(A)**;  $p > 0.008$  in **(B)**), \* =  $p < 0.05$ , \*\*\* =  $p < 0.001$

1043

#### 1044 **Figure 7. NHJ-1 acts in the cNHEJ pathway**

1045 **(A)** Total brood size quantification of N2 [R], N2 [S], *lig-4(vv134)* [R], and *lig-4(vv141)* [S]  
1046 hermaphrodites. The post-IR brood size of *lig-4(vv141)* [S] animals, which harbour the  
1047 same inactivating mutation as *lig-4(vv134)* [R] animals except in the sensitive genetic  
1048 background, is not significantly different than either N2 [S] or *lig-4(vv134)* [R] animals  
1049 ( $p > 0.05$ ). The lack of additive IR-sensitivity strongly suggests that N2 [S] is IR-sensitive  
1050 because of a loss of cNHEJ activity. All statistical comparisons shown in the figure are to  
1051 *lig-4* [S] animals from the corresponding treatment group (Kruskal-Wallis test, followed by  
1052 Dunn's post-hoc test). Error bars represent the median and interquartile range. Sample  
1053 size (n) is 23 for unirradiated N2 [R], 36 for irradiated N2 [R], 23 for unirradiated N2 [S],  
1054 40 for irradiated N2 [S], 23 for unirradiated *lig-4* [R], 31 for irradiated *lig-4* [R], 24 for  
1055 unirradiated *lig-4* [S], and 40 for irradiated *lig-4* [S].

1056 **(B)** Quantification of post-IR somatic phenotypes three days after IR treatment in the  
1057 same groups as in **(A)**. The incidence of somatic phenotypes in *lig-4* [S] is not significantly  
1058 different from either *lig-4* [R] or N2 [S] following either 37.5 Gy or 75 Gy of IR ( $p > 0.05$  for  
1059 all comparisons), showing that the *lig-4* mutation and the N2 [S] background are not  
1060 additive with respect to IR-associated somatic phenotypes. All statistical comparisons

1061 shown in the figure are to *lig-4* [S] animals from the corresponding treatment group (Chi-  
1062 squared test, Bonferroni corrected for multiple comparisons to  $\alpha = 0.008$ ). Sample size  
1063 (n) is 146/201/181 for N2 [R] No IR/37.5 Gy/75 Gy, 188/106/146 for N2 [S] No IR/37.5  
1064 Gy/75 Gy, 208/131/167 for *lig-4* [R] No IR/37.5 Gy/ 75 Gy, and 177/134/125 for *lig-4* [S]  
1065 No IR/37.5 Gy/ 75 Gy.

1066 **(C)** Total brood size quantification of N2 [R], *nhj-1(vv144)* [R], *cku-80(tm1203)*, and *cku-*  
1067 *80(tm1203); nhj-1(vv144)*. Double mutants of *cku-80(tm1203)* and *nhj-1(vv144)* do not  
1068 exhibit a significantly different post-IR brood size than either single mutant ( $p > 0.05$  for  
1069 both), showing that NHJ-1 functions in the same pathway as CKU-80. All statistical  
1070 comparisons shown in the figure are to *cku-80(tm1203); nhj-1(vv144)* animals from the  
1071 corresponding treatment group (Kruskal-Wallis test, followed by Dunn's post-hoc test).  
1072 Error bars represent the median and interquartile range. Sample size (n) is 23 for  
1073 unirradiated N2 [R], 36 for irradiated N2 [R], 23 for unirradiated N2 [S], 40 for irradiated  
1074 N2 [S], 23 for unirradiated *lig-4* [R], 31 for irradiated *lig-4* [R], 24 for unirradiated *lig-4* [S],  
1075 and 40 for irradiated *lig-4* [S].

1076 **(D)** Quantification of post-IR somatic phenotypes three days after IR treatment in the  
1077 same groups as in **(C)**. Vulval and slow growth phenotypes do not have a significantly  
1078 different incidence in the double mutant and either single mutant ( $p > 0.05$  for all  
1079 comparisons), supporting the conclusion of CKU-80 and NHJ-1 acting in the same  
1080 pathway. All statistical comparisons shown in the figure are to *cku-80(tm1203); nhj-*  
1081 *1(vv144)* animals from the corresponding treatment group (Chi-squared test, Bonferroni  
1082 corrected for multiple comparisons to  $\alpha = 0.008$ ). Sample size (n) is 181/194/103 for N2  
1083 [R] No IR/37.5 Gy/75 Gy, 156/211/107 for *nhj-1(vv144)* [R] No IR/37.5 Gy/75 Gy,  
1084 156/163/136 for *cku-80(tm1203)* No IR/37.5 Gy/75 Gy, and 225/274/175 for *cku-*  
1085 *80(tm1203); nhj-1(vv144)* No IR/37.5 Gy/75 Gy. ns = not significant ( $p > 0.05$  in **(A)**;  $p > 0.008$   
1086 in **(B)**), \*\*\* =  $p < 0.001$

1087

## 1088 **Figure 8. NHJ-1 acts downstream of the Ku ring in the adult germline**

1089 **(A)** Table showing the proportion of eggs hatching in *com-1*, *com-1; nhj-1*, and *com-1 lig-*  
1090 *4* mutants treated with *cku-80(RNAi)* and controls. In control conditions, only a small



1091 fraction (<1%) of eggs laid in all three genotypes hatch. With RNAi against *cku-80*, the  
1092 proportion of hatching eggs is significantly increased ( $p < 0.001$  versus RNAi control) in all  
1093 three genotypes. All statistical comparisons shown in the figure are to the RNAi control  
1094 group within the same genotype (Chi-squared test, Bonferroni correction for multiple  
1095 comparisons to = 0.008).

1096 **(B)** Example micrographs showing the diverse DNA morphologies in diakinesis nuclei  
1097 with low and high numbers of DAPI-staining entities in *com-1*, *com-1; nhj-1*, and *com-1*  
1098 *lig-4* mutants.

1099 **(C)** Quantification of DAPI-staining bodies in *com-1*, *com-1 lig-4*, and *com-1; nhj-1*  
1100 mutants. The number of DAPI-staining bodies is significantly higher in *com-1 lig-4*  
1101 ( $p < 0.05$ ) and *com-1; nhj-1* ( $p < 0.001$ ) double mutants is significantly higher than that of  
1102 *com-1* single mutants, while the two double mutants are not significantly different from  
1103 each other ( $p > 0.05$ ). Sample size ( $n$ ) is 40 for *com-1*, 49 for *com-1 lig-4*, and 33 for *com-*  
1104 *1; nhj-1* mutants.

1105

## 1106 **Figure 9. Endogenous NHJ-1 localization in the L1 larva**

1107 **(A)** Representative micrographs showing the subcellular localization of NHJ-1::OLLAS  
1108 from the endogenous locus, together with DNA staining (DAPI) and the germline marker  
1109 HTP-3, in the L1 larva. The loss of *cku-80* or *lig-4* does not detectably affect the  
1110 localization of NHJ-1::OLLAS, and neither does the radiation treatment in either the  
1111 control or *cku-80* or *lig-4* mutant backgrounds. Dotted lines delineate PGC nuclei.

1112 **(B)** Representative micrographs showing the subcellular localization of NHJ-1::OLLAS in  
1113 L1 larvae in the same genotypes and conditions as in **(A)**, showing a wider field of view  
1114 for comparison. Dotted lines box the PGCs.

1115

## 1116 **Figure 10. Endogenous NHJ-1 localization in the adult germline**

1117 **(A)** Representative micrographs of NHJ-1::OLLAS expression from the endogenous  
1118 locus in adult germline cells. Punctate nuclear expression of NHJ-1::OLLAS becomes

1119 reliably visible in diplotene, but is not chromatin associated and remains detectable in  
1120 diakinesis. Adult intestinal cell shown for comparison.

1121 **(B)** Representative micrographs of NHJ-1::OLLAS expression from the endogenous  
1122 locus in adult germline cells in animals deficient for *cku-80*. The loss of CKU-80 does not  
1123 perturb the localization of NHJ-1::OLLAS either in the germline or in the intestine.

1124 **(C)** Representative micrographs of NHJ-1::OLLAS expression from the endogenous  
1125 locus in adult germline cells in animals deficient for *lig-4*. Like the loss of CKU-80, the loss  
1126 of LIG-4 does not affect the pattern of NHJ-1::OLLAS expression either in the germ cells  
1127 or intestinal cells.

1128

### 1129 **Figure 11. Endogenous LIG-4 localization in the L1**

1130 **(A)** Representative micrographs showing the subcellular localization of LIG-4::OLLAS  
1131 from the endogenous locus, together with DNA staining (DAPI) and the germline marker  
1132 HTP-3, in the L1 larva. The LIG-4 signal is detectable beyond background levels only in  
1133 a row of nuclei along the anterior-posterior axis (see **(B)**). No LIG-4 signal is detected in  
1134 the PGCs.

1135 **(B)** Representative micrographs showing the subcellular localization of LIG-4::OLLAS,  
1136 HTP-3, and DNA in the same genotypes and conditions as in **(A)**, but in a wider field of  
1137 view, showing the enrichment in a longitudinal row of nuclei.

1138 **(C)** Representative micrograph showing the nuclear co-localization of LIG-4::OLLAS and  
1139 ELT-2::GFP, an intestinal cell marker. The nuclei which most strongly express LIG-4 also  
1140 express the intestinal marker ELT-2::GFP, suggesting that LIG-4 is enriched in the  
1141 intestine.

1142

### 1143 **Figure 12. Endogenous LIG-4 localization in the adult germline**

1144 **(A)** Representative micrographs of LIG-4::OLLAS expression from the endogenous locus  
1145 in adult germline cells. The expression of LIG-4::OLLAS becomes reliably visible in

1146 pachytene, and is nuclear, punctate, and not chromatin associated. An adult intestinal  
1147 cell, where *LIG-4* is also strongly expressed, is shown for comparison.

1148 **(B)** Representative micrographs of *LIG-4::OLLAS* expression from the endogenous locus  
1149 in adult germline cells in animals deficient for *cku-80*. Similar to *NHJ-1::OLLAS*, the loss  
1150 of *CKU-80* does not alter the localization of *LIG-4::OLLAS* either in the germline or in the  
1151 intestine.

1152 **(C)** Representative micrographs of *LIG-4::OLLAS* expression from the endogenous locus  
1153 in adult germline cells in animals deficient for *nhj-1*. The absence of *NHJ-1* does not affect  
1154 the localization pattern of *LIG-4*.

1155

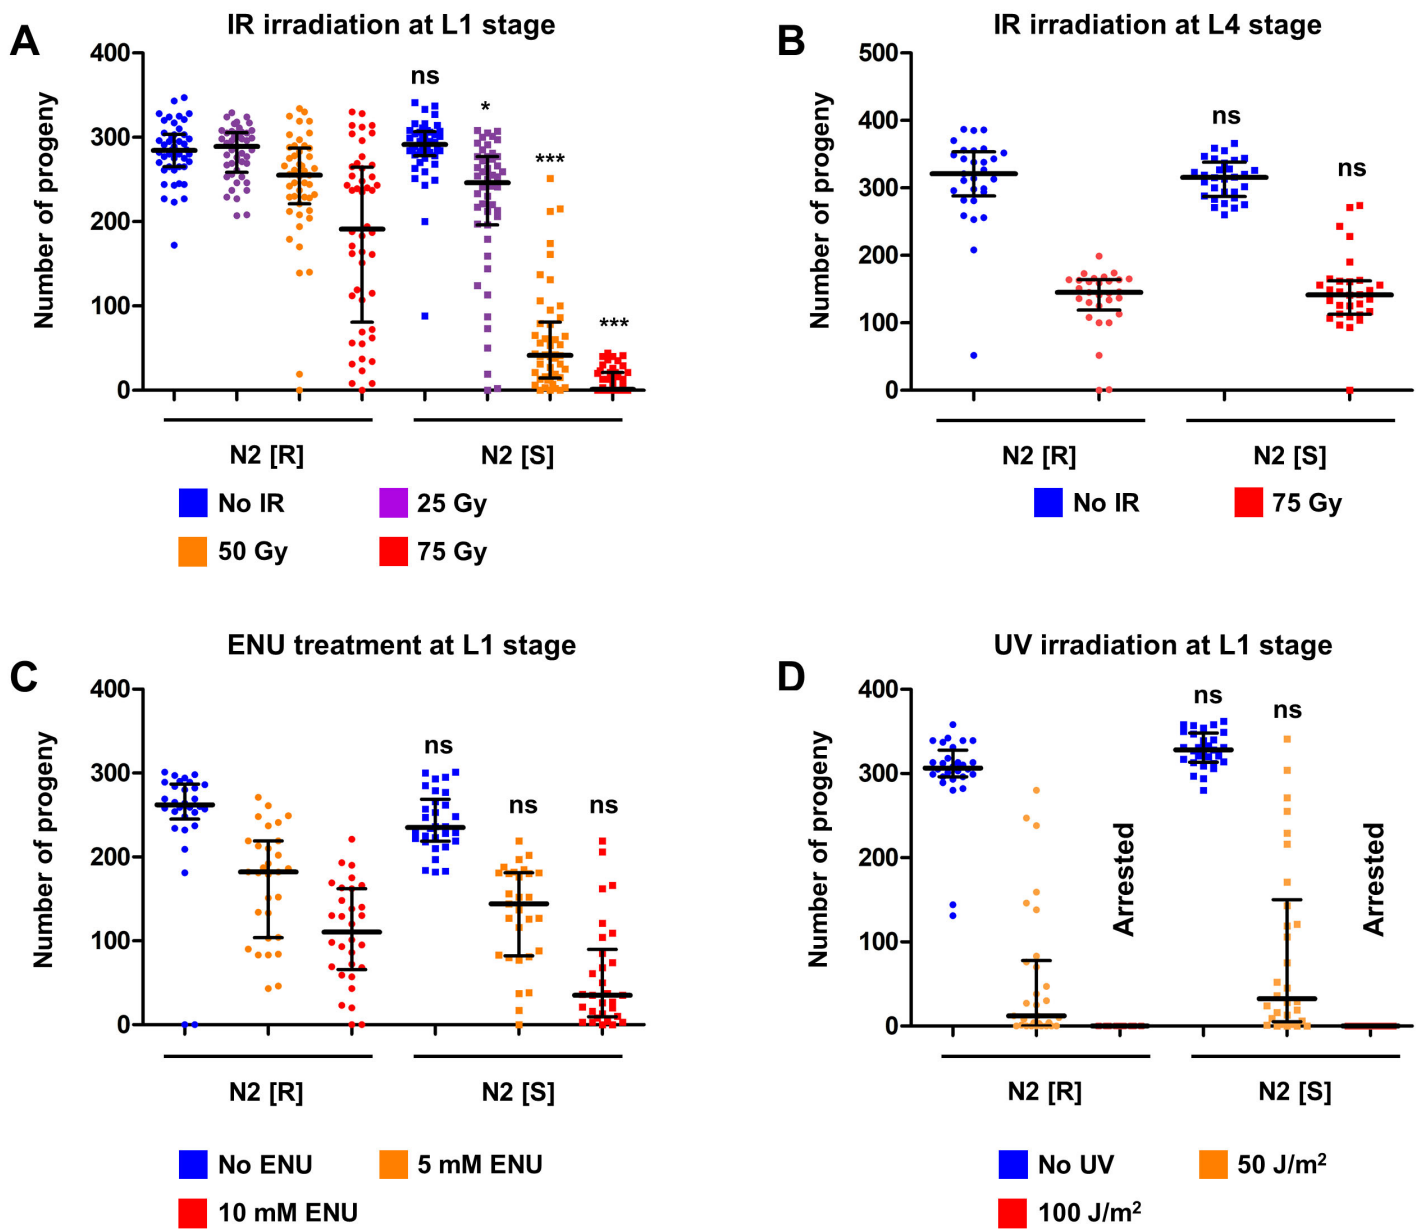

bioRxiv preprint doi: <https://doi.org/10.1101/763235>; this version posted September 9, 2019. The copyright holder for this preprint (which was not certified by peer review) is the author/funder. All rights reserved. No reuse allowed without permission.

bioRxiv preprint doi: <https://doi.org/10.1101/763235>; this version posted September 9, 2019. The copyright holder for this preprint (which was not certified by peer review) is the author/funder. All rights reserved. No reuse allowed without permission.

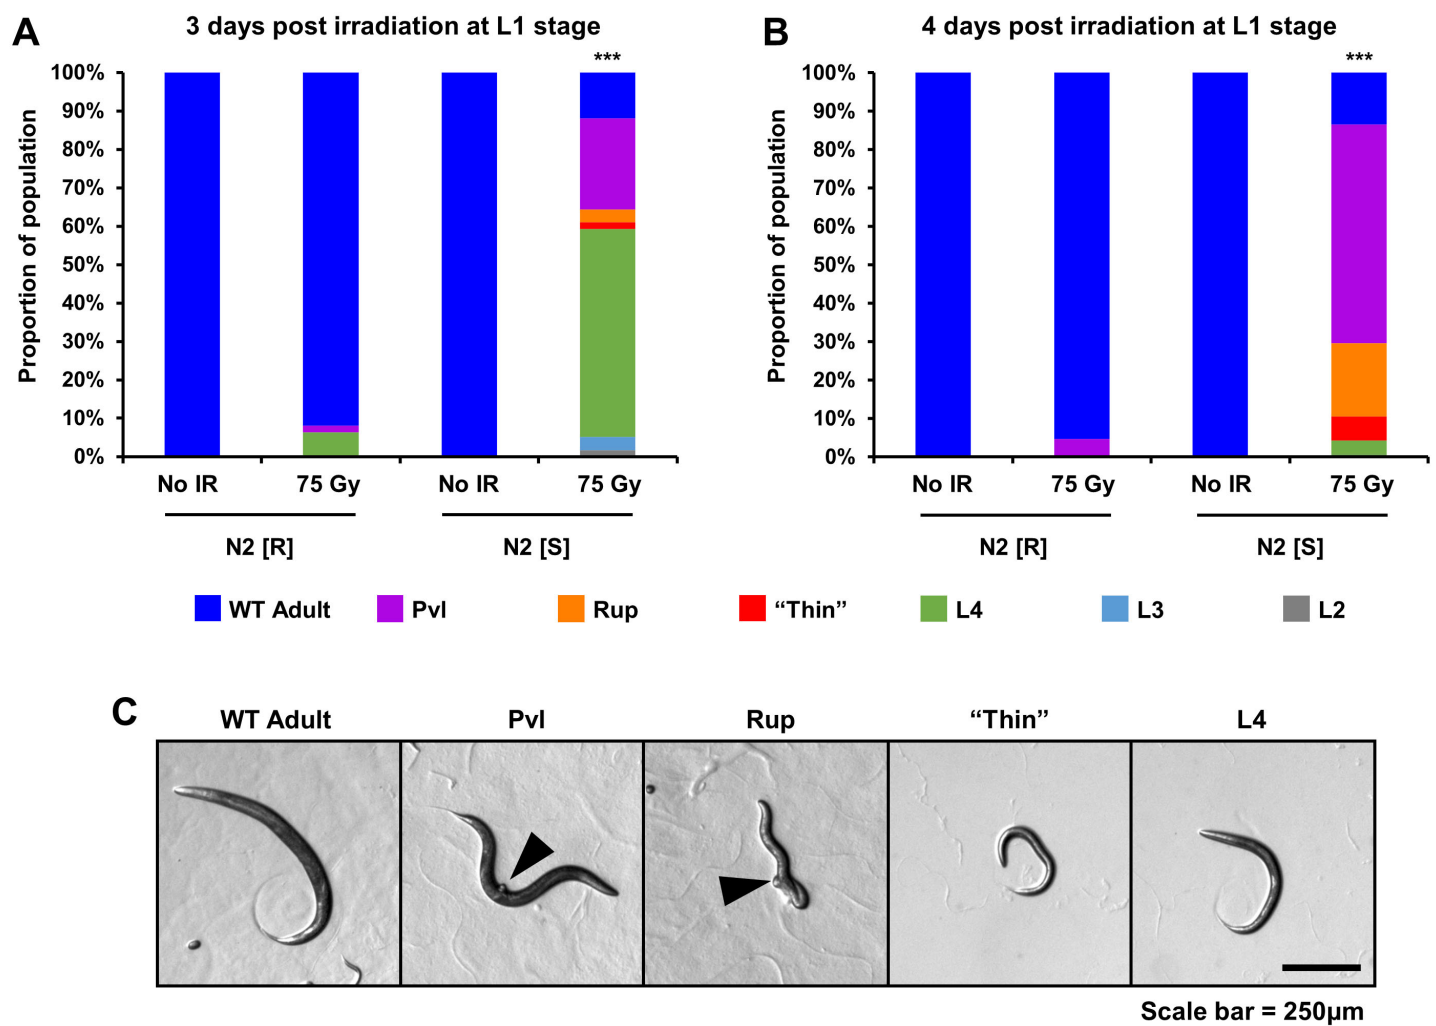

**D**

|                       | No IR at L1<br>Egl/total (%) | 75 Gy at L1<br>Egl/total (%) |
|-----------------------|------------------------------|------------------------------|
| N2 [R] 1 days post-L4 | 0/100 (0%)                   | 2/100 (2%)                   |
| N2 [S] 1 days post-L4 | 0/100 (0%)                   | 25/100 (25%)***              |
| N2 [R] 2 days post-L4 | 0/100 (0%)                   | 3/100 (3%)                   |
| N2 [S] 2 days post-L4 | 0/100 (0%)                   | 31/100 (31%)***              |

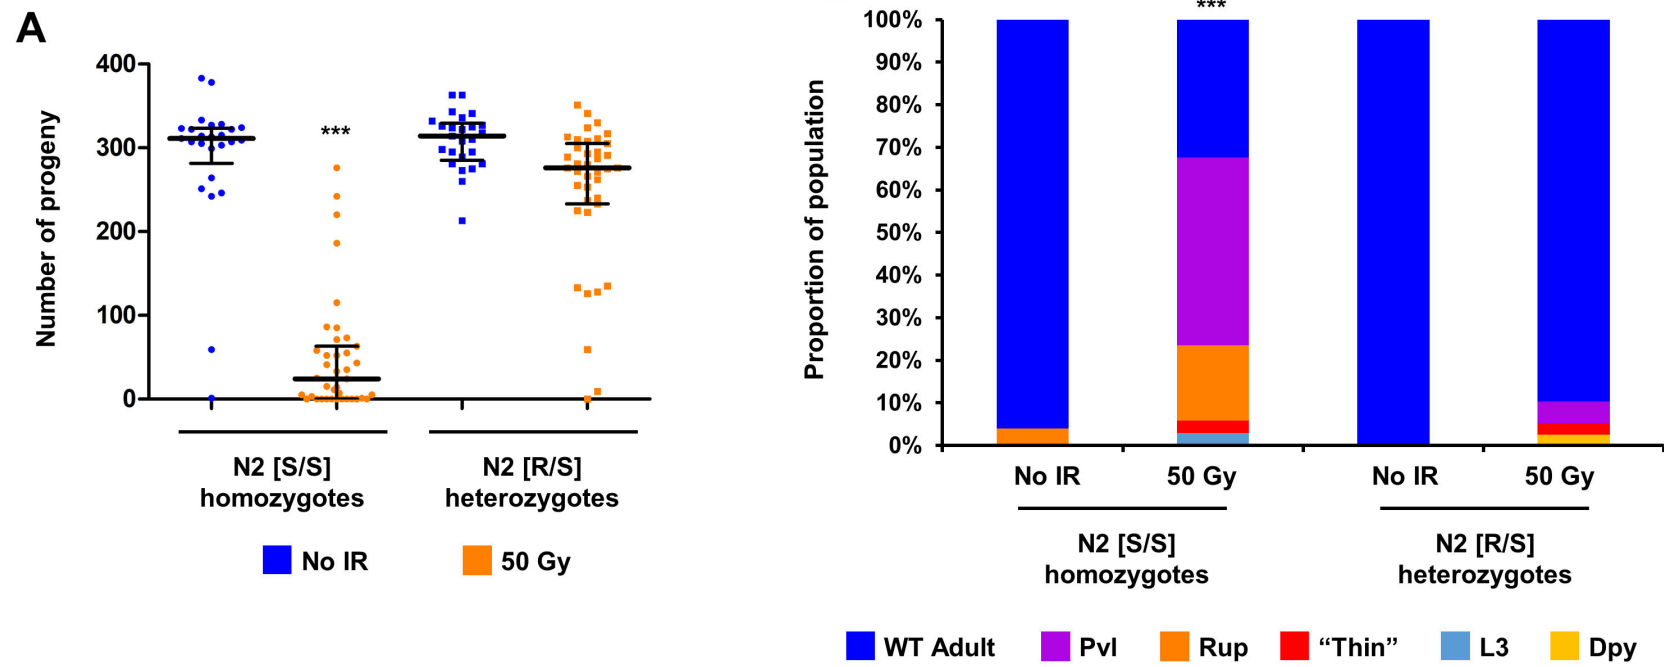

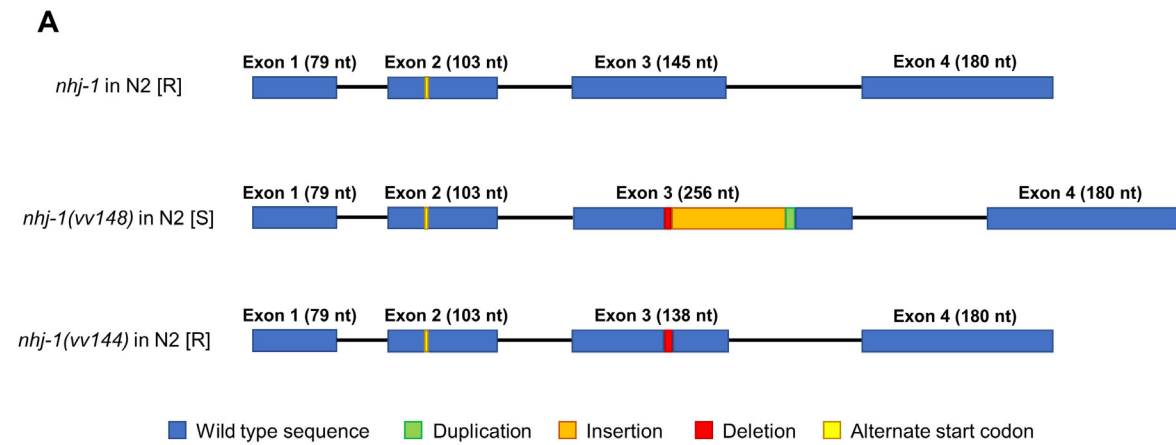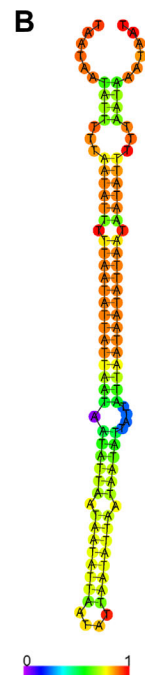

**C**

NHJ-1<sup>WT</sup>

MSILVYDREHNFKKWYIYWIPKTKMLGVKDDKD VVEK MCTLQERTDILK VSKSLVEEKWSSLFSESGL  
HIEEVCEKELVLT FALQRNITLERTELSGRFDECLYLEYLR LKTLTNVSPMKRKR TASTVEHVIRSDDIKPI  
LAPKSDPVKKRTRRMAAKASGPEFDDE **Stop** 168

NHJ-1<sup>vv148</sup>

MSILVYDREHNFKKWYIYWIPKTKMLGVKDDKD VVEK MCTLQERTDILK VSKSLVEEKWSSLFSESGL  
HIEEVCEKELVLT FALQRNIT **IY Stop** 93

NHJ-1<sup>vv144</sup>

MSILVYDREHNFKKWYIYWIPKTKMLGVKDDKD VVEK MCTLQERTDILK VSKSLVEEKWSSLFSESGL  
HIEEVCEKELVLT FALQRNI **SVRSFLED SMSASTWNICVSRR Stop** 111

■ Wild type sequence    ■ Missense residues    ■ Stop codon

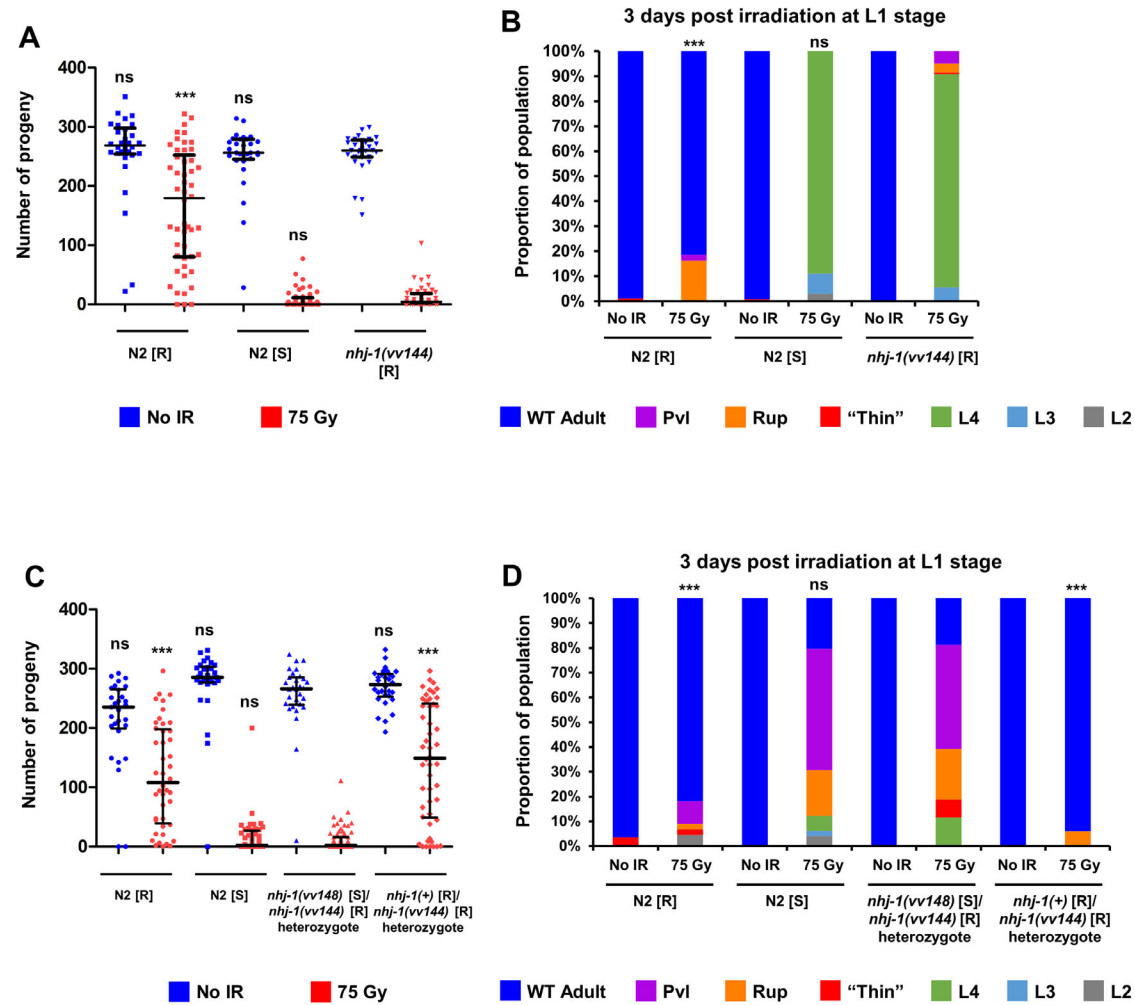



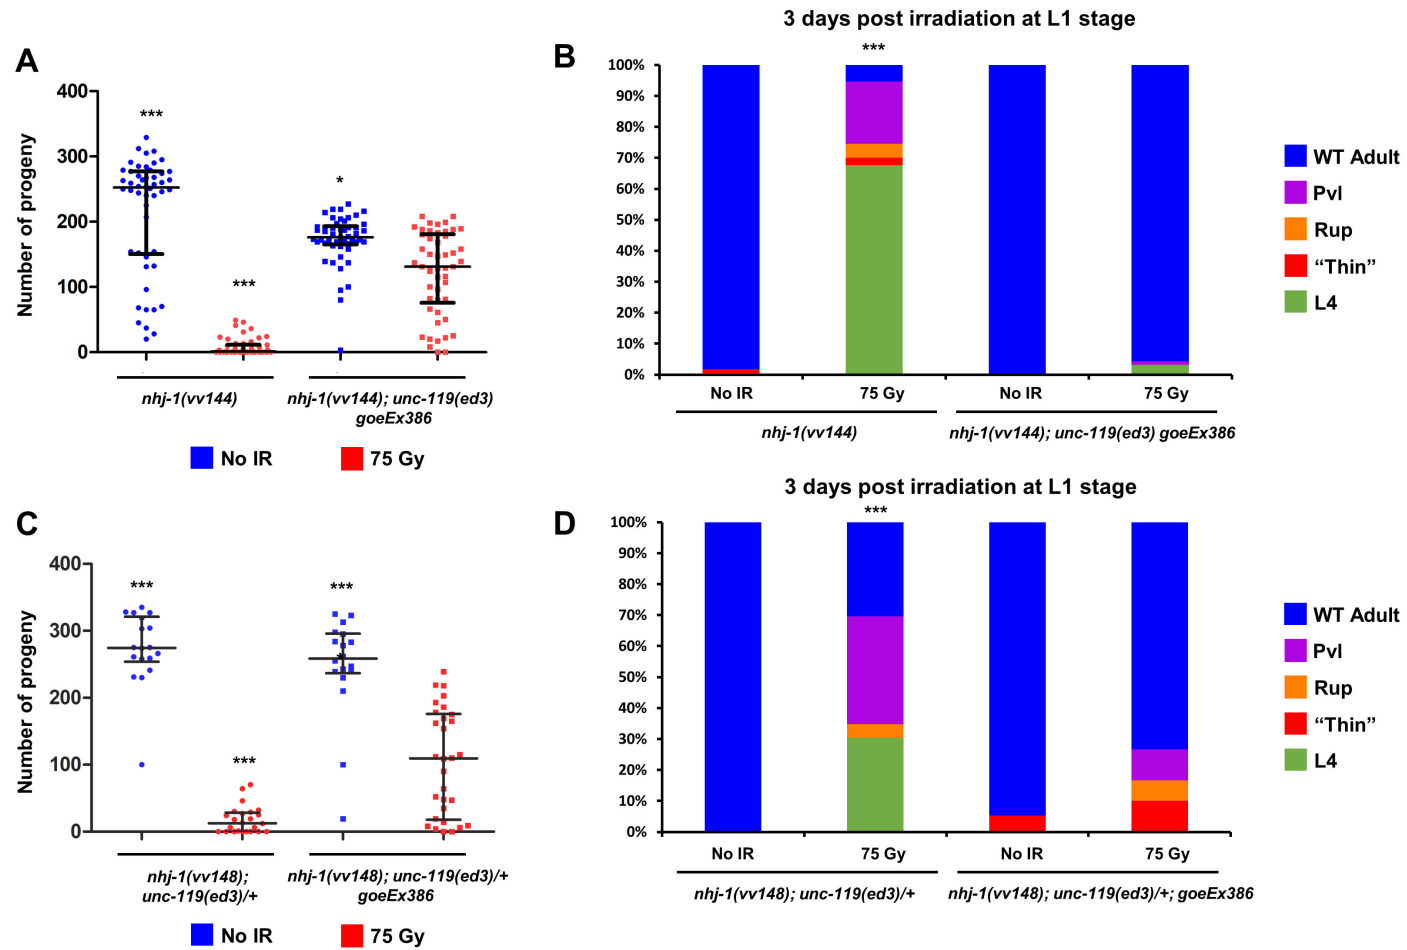

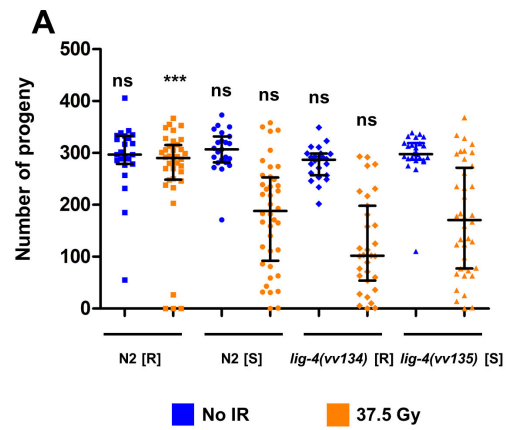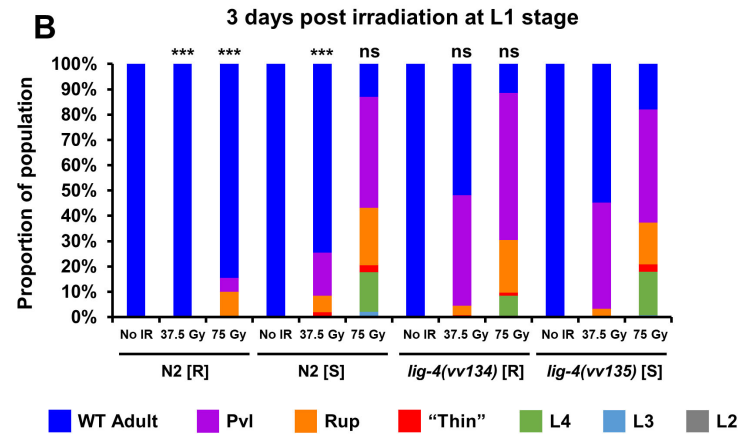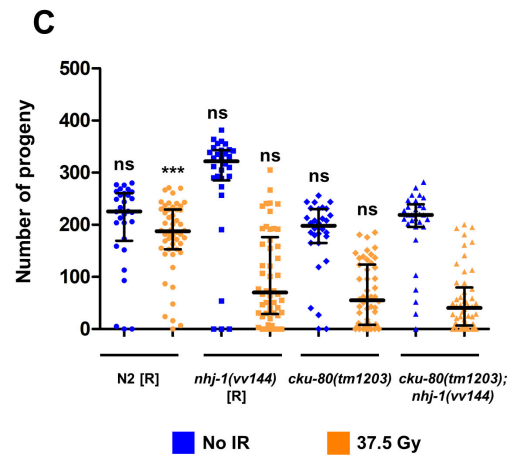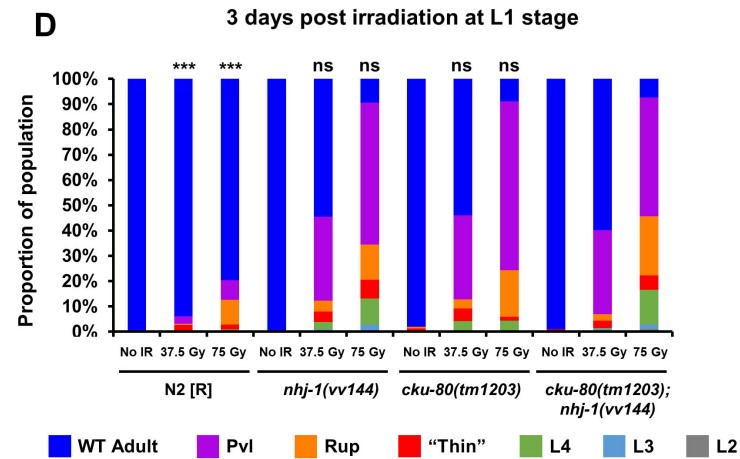

bioRxiv preprint doi: <https://doi.org/10.1101/763235>; this version posted September 9, 2019. The copyright holder for this preprint (which was not certified by peer review) is the author/funder. All rights reserved. No reuse allowed without permission.

**A**

| Genotype     | Control RNAi (empty vector) |                                   |                                  | <i>cku-80</i> (RNAi)        |                                   |                                  |
|--------------|-----------------------------|-----------------------------------|----------------------------------|-----------------------------|-----------------------------------|----------------------------------|
|              | <i>com-1(t1626)</i>         | <i>com-1(t1626); nhj-1(vv144)</i> | <i>com-1(t1626) lig-4(vv134)</i> | <i>com-1(t1626)</i>         | <i>com-1(t1626); nhj-1(vv144)</i> | <i>com-1(t1626) lig-4(vv134)</i> |
| Eggs laid    | 982                         | 1106                              | 1123                             | 1302                        | 1157                              | 1343                             |
| Eggs hatched | 3 (0.31%)                   | 0 (0.00%)                         | 6 (0.53%)                        | 344 (26.42%) <sup>***</sup> | 321 (27.74%) <sup>***</sup>       | 360 (26.81%) <sup>***</sup>      |

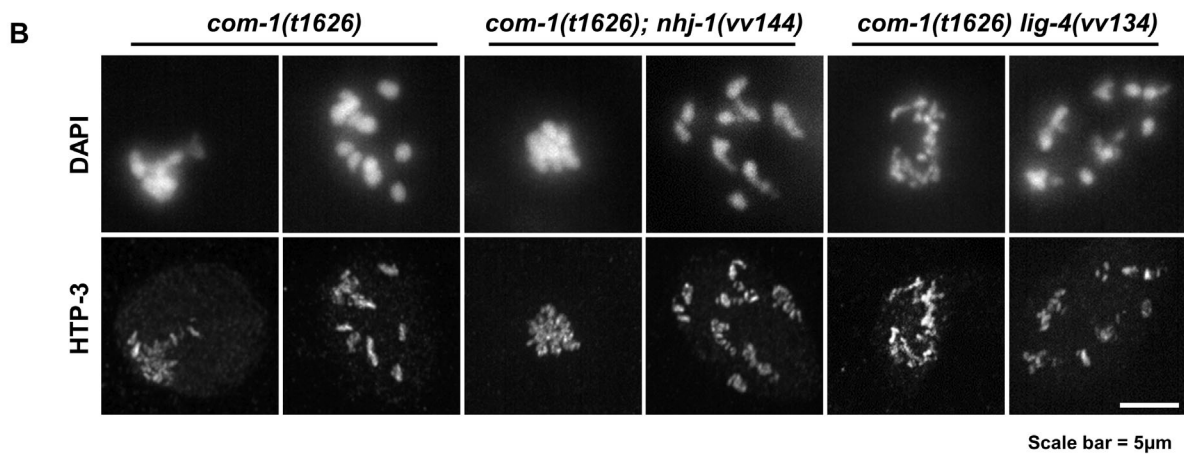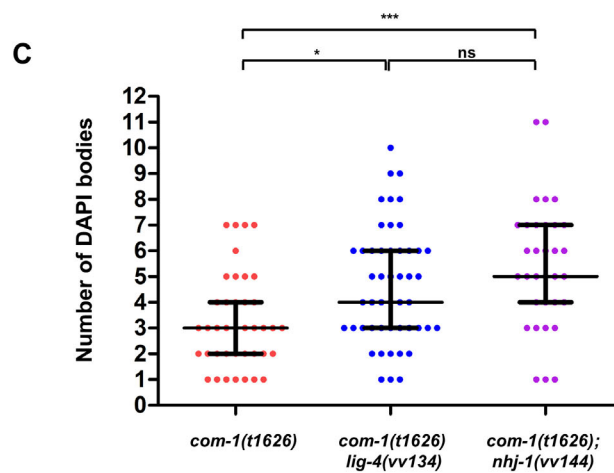

bioRxiv preprint doi: <https://doi.org/10.1101/763235>; this version posted September 9, 2019. The copyright holder for this preprint (which was not certified by peer review) is the author/funder. All rights reserved. No reuse allowed without permission.

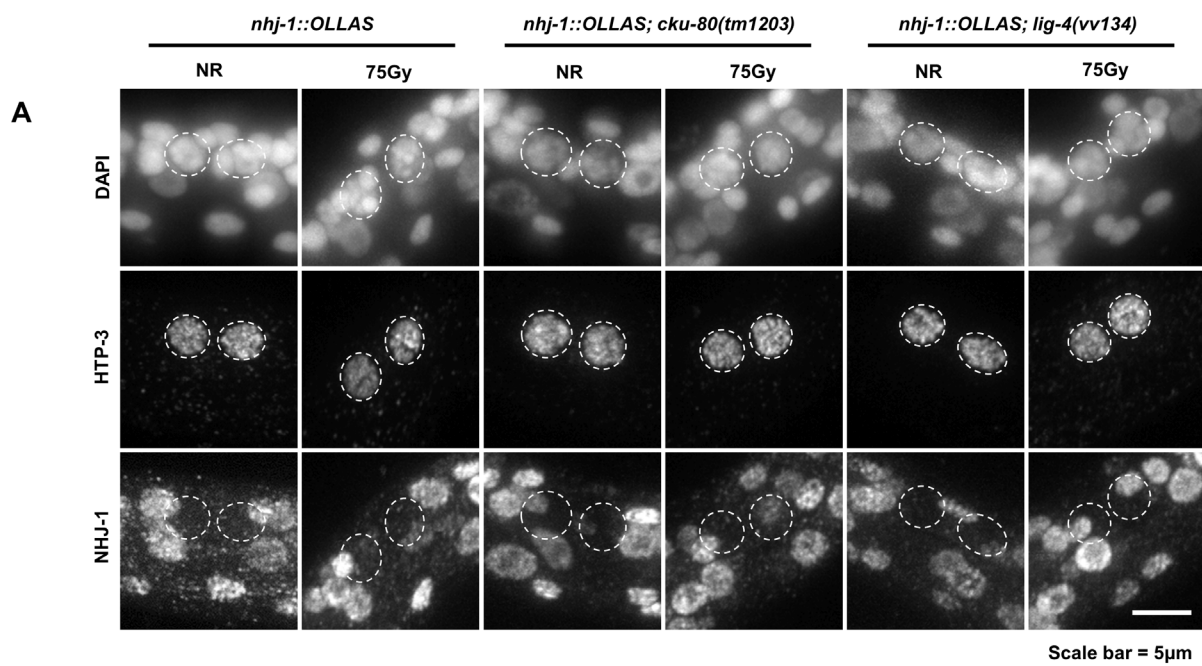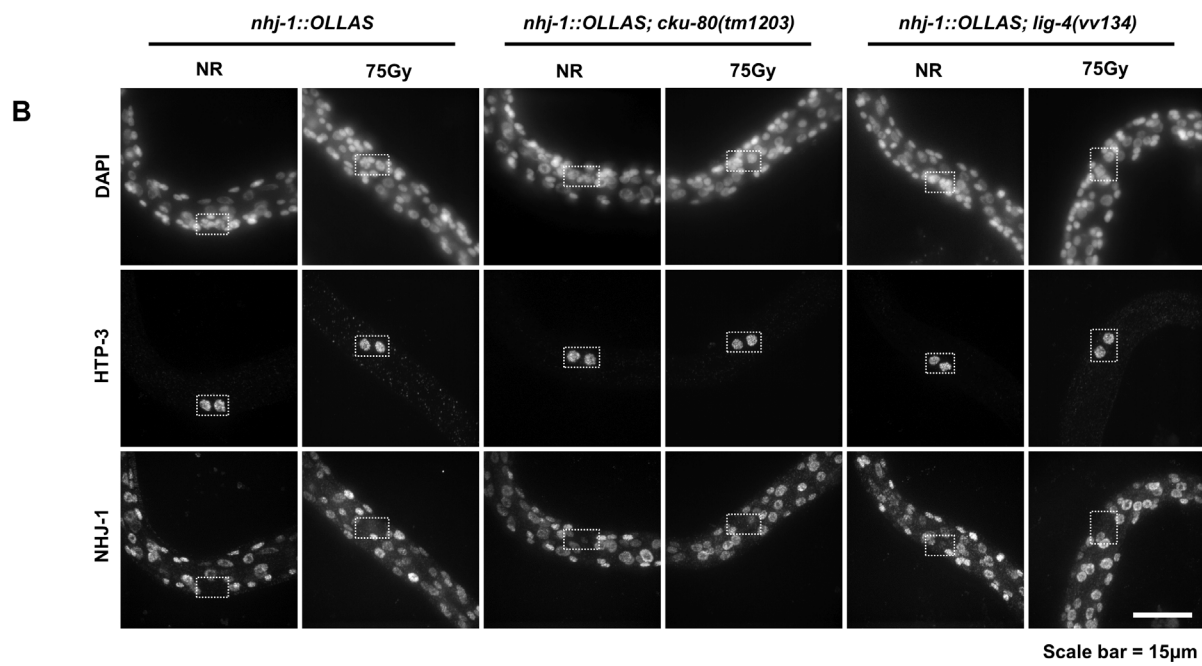

bioRxiv preprint doi: <https://doi.org/10.1101/763235>; this version posted September 9, 2019. The copyright holder for this preprint (which was not certified by peer review) is the author/funder. All rights reserved. No reuse allowed without permission.

**A**

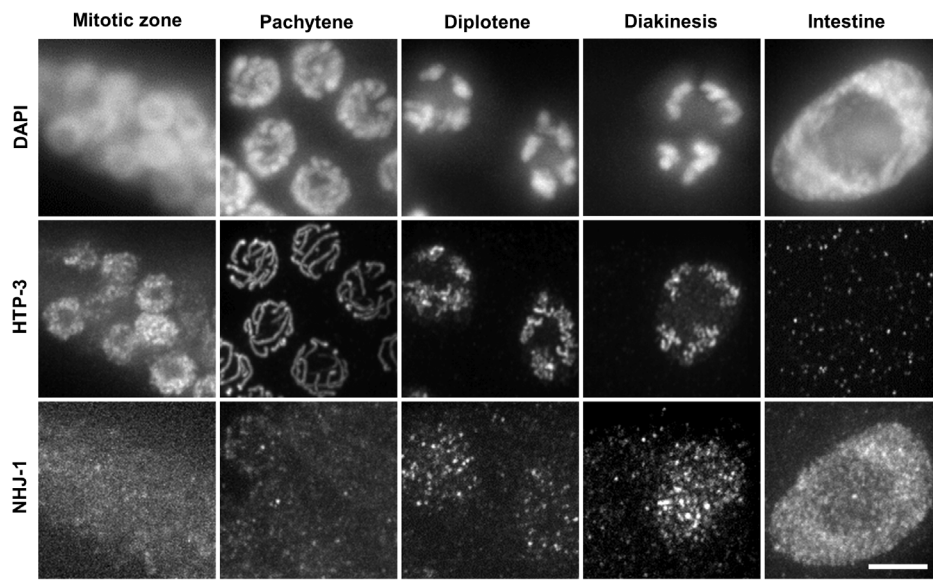

Scale bar = 5µm

**B**

*nhj-1::OLLAS; cku-80(tm1203)*

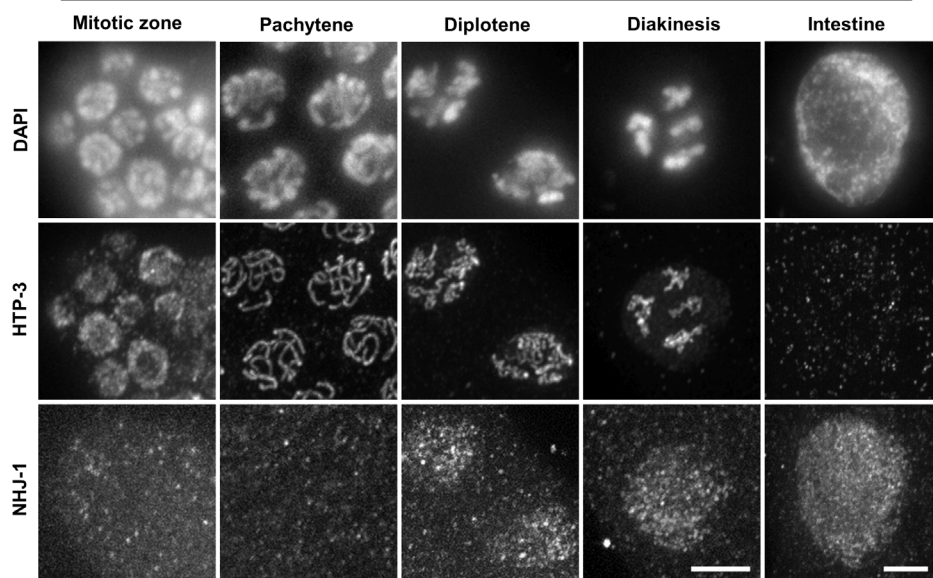

Scale bar = 5µm

**E**

*nhj-1::OLLAS; lig-4(vv134)*

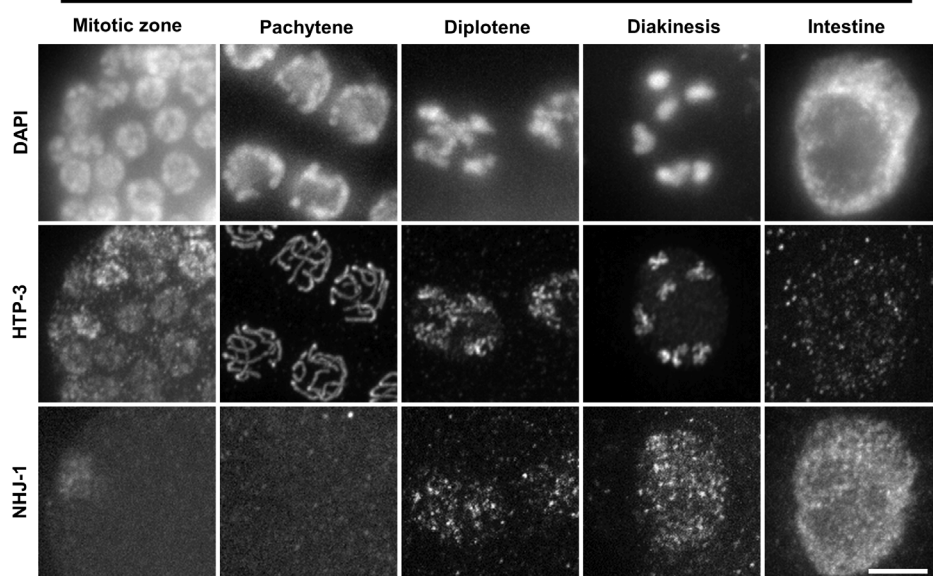

Scale bar = 5µm

bioRxiv preprint doi: <https://doi.org/10.1101/763235>; this version posted September 9, 2019. The copyright holder for this preprint (which was not certified by peer review) is the author/funder. All rights reserved. No reuse allowed without permission.

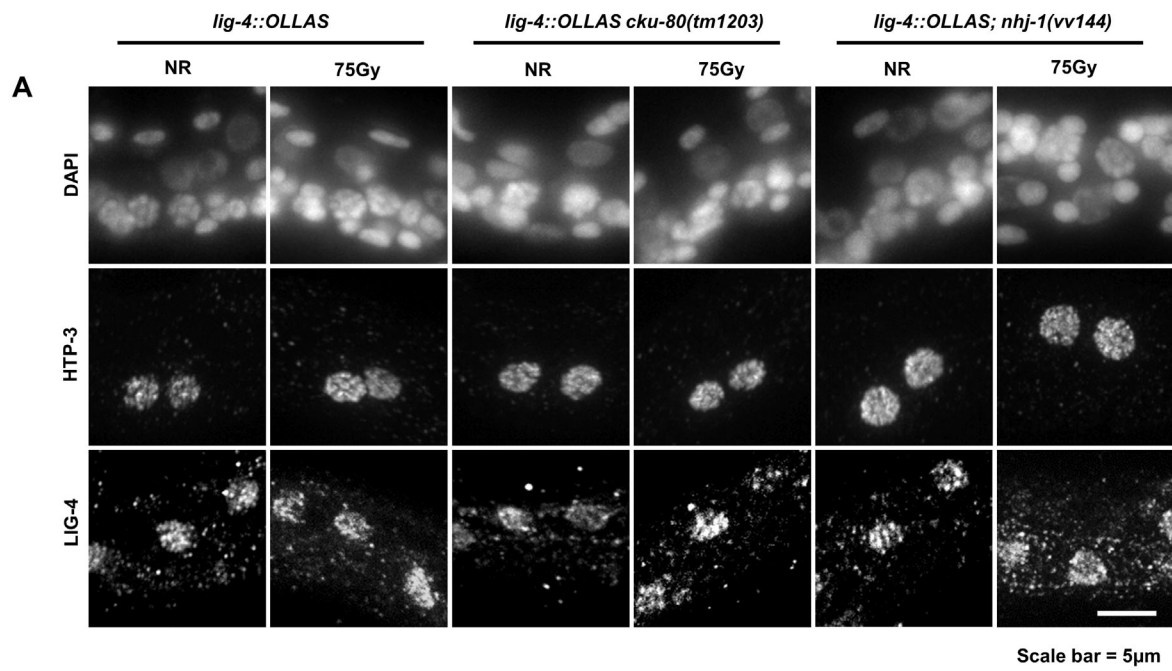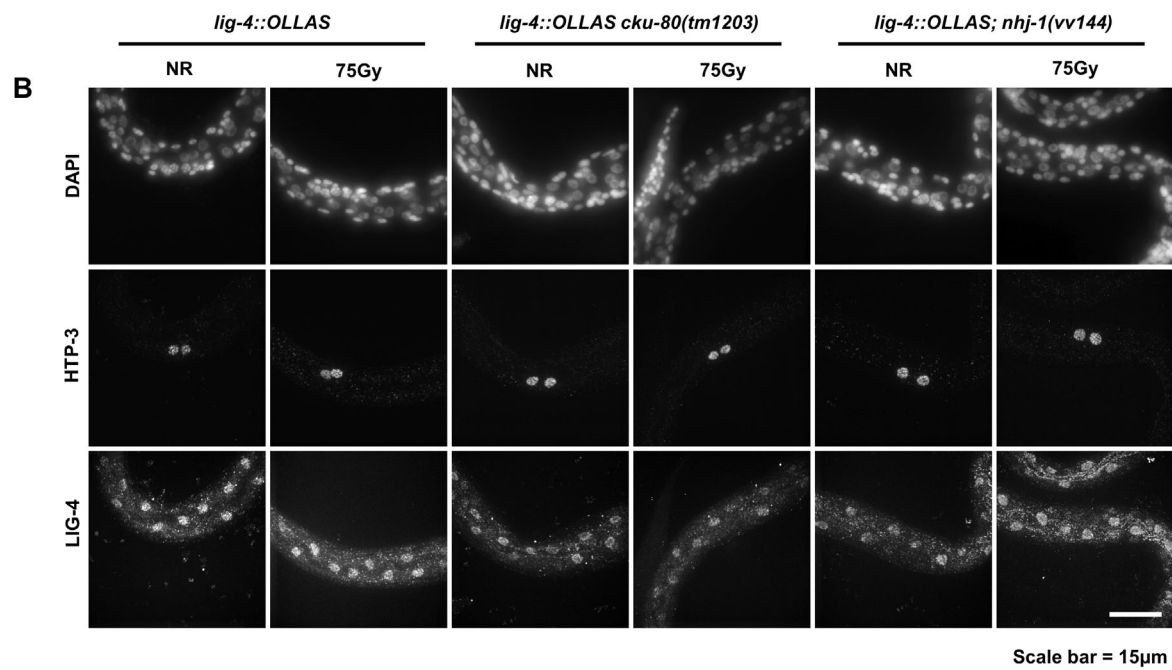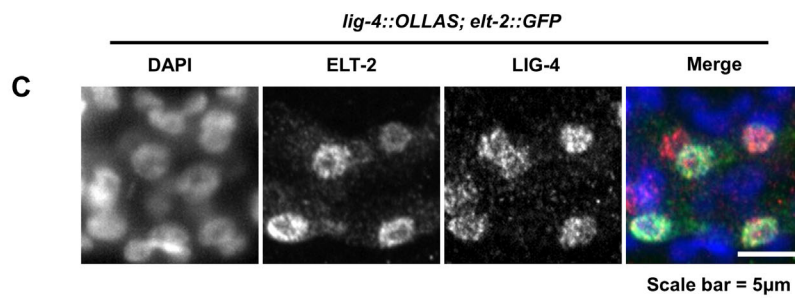

bioRxiv preprint doi: <https://doi.org/10.1101/763235>; this version posted September 9, 2019. The copyright holder for this preprint (which was not certified by peer review) is the author/funder. All rights reserved. No reuse allowed without permission.

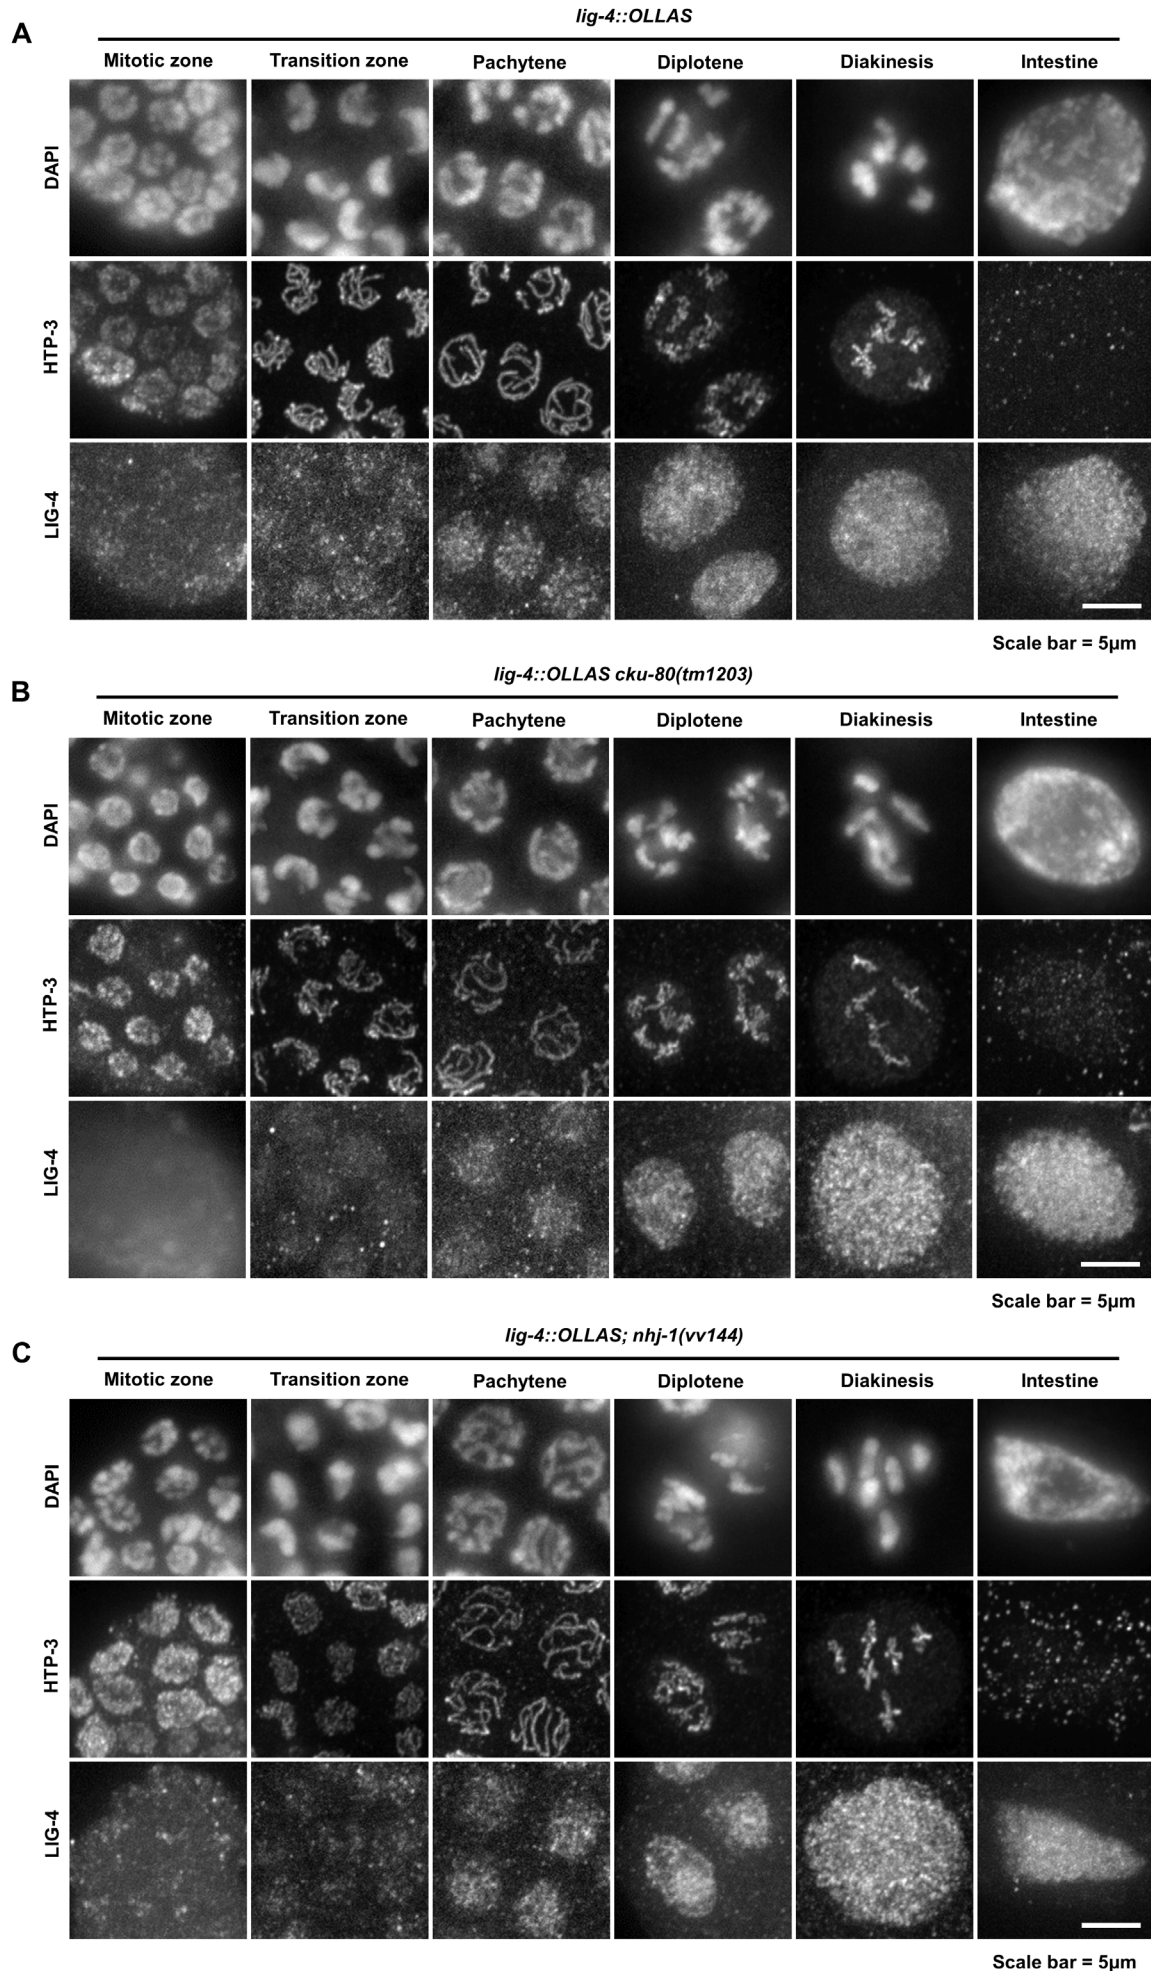

Source: https://www.biorxiv.org/content/10.1101/763235v1.full.pdf
